# Supplementary material
Source: publisher figshare collection journal article supplement (https://acs.figshare.com/ndownloader/files/15553070)
Supplement: Supplementary file 1 [file 15553070]

## Sheet: Table S1
Table S1 Normalized data for metabolomics study of MOR in different growth years
Sample	Year(s)	116.9292/12.85	237.057/10.57	238.0284/10.35	253.0519/10.36	255.2345/11.56	267.0675/10.46	279.2344/11.37	281.2502/11.61	283.2658/11.99	327.2921/12.11	341.1106/1.22	373.1158/7.11	377.0875/1.05	405.1056/6.04	417.1055/4.69	431.1214/9.01	451.1473/8.49	469.0674/1.77	503.16375/1.25	549.1695/1.26	583.2826/9.76	683.2271/1.17	723.5052/9.93	740.4948/9.93	809.452/9.93	827.2702/1.95	841.2672/2.51	845.2792/1.23	851.2697/2.29	922.2938/2.68	932.2963/2.37	980.31755/2.81	989.3232/2.13	1003.3201/2.81	1035.6197/10.02	1046.328/2.28	1061.34395/2.96	1094.34905/2.71	1142.37055/3.07	1151.3767/2.14	1175.3754/2.81	1223.3969/3.17	1256.40165/2.94	1304.4229/3.27	1370.4331/2.83	1475.4816/2.36	1655.54695/1.96
1W1a	1	10.161	8.86629	6.77819	71.7438	6.74205	48.4747	4.44614	6.24775	6.46831	0.425871	19.3909	79.4374	22.7852	7.01636	10.9833	113.402	3.23818	4.48476	44.0015	28.486	8.2493	4.44567	7.54862	2.85587	29.532	173.96	3.64643	20.7343	7.66991	5.04744	6.11291	7.30489	86.6175	4.36866	1.71649	5.09982	7.68994	2.16261	11.0998	47.4018	5.24765	9.27457	3.75751	5.82275	3.15747	9.45071	16.4456
1W1b	1	9.9635	9.23834	7.13714	76.2139	6.76297	49.4124	0.436273	6.50546	6.01517	0.436273	19.4848	81.49	26.6453	7.22763	11.8791	118.949	3.31428	3.99289	44.3894	29.4114	6.24498	4.37457	7.81248	3.0448	31.2698	157.805	3.0259	21.0208	6.69141	5.74903	5.43101	7.48825	91.5546	4.91929	1.54179	4.46644	7.26546	1.98197	10.7803	46.7879	5.75721	9.2923	4.5231	5.75869	3.26631	6.54493	16.697
1W1c	1	10.8887	9.67285	4.2397	74.171	6.57647	50.7937	5.14062	6.59116	6.42147	0.43678	19.6521	82.6225	29.0382	7.1485	11.8033	103.314	3.29936	4.20578	44.2226	29.7685	8.67955	4.24928	7.94368	2.91337	31.3335	159.936	3.63743	20.7507	6.05864	5.53934	5.67114	7.75662	95.693	4.96243	1.75254	4.70856	7.18845	1.89757	11.1229	47.1805	5.11132	9.38631	4.40153	5.59234	3.14534	6.53808	16.8425
1W2a	1	10.3903	8.34696	6.75102	73.4566	7.16371	46.2	4.95337	6.48574	7.67311	0.422103	18.9239	80.9613	28.1924	7.04773	11.1511	113.995	3.32405	4.18072	43.6242	27.858	7.93259	4.22326	8.51653	2.9014	31.5753	167.491	3.37371	20.3034	6.56273	5.56204	5.81901	7.63328	88.0064	5.01463	1.82375	4.82489	7.15619	2.13483	10.9928	46.5068	5.5465	9.21247	4.49802	5.42977	3.10864	6.22001	16.5291
1W2b	1	11.1286	8.64831	6.6927	70.2874	6.91108	47.757	5.09508	6.54877	7.30887	0.433018	19.1671	81.5209	29.8041	7.26704	11.5742	117.567	3.43097	4.10793	44.142	29.0111	8.18905	4.2174	8.31633	3.11015	30.9422	172.67	3.68912	20.7818	7.0884	4.3774	5.40573	7.68206	78.6822	5.03591	1.7357	0.433018	7.45224	2.04654	10.8903	46.9224	5.77392	9.1256	4.62769	5.63419	3.24514	6.62104	16.9019
1W2c	1	10.4411	5.9033	6.55571	72.2404	6.58263	46.1542	4.94546	6.35425	6.91595	2.89181	18.7084	79.5771	28.0884	7.162	10.9465	113.325	3.11591	4.22114	43.2864	28.1232	7.81726	4.13034	8.2311	2.88122	31.2737	167.526	3.87181	19.8922	6.90754	5.27042	5.70926	7.02568	91.3796	4.54401	1.82239	5.63976	7.55256	2.18259	10.9779	46.4537	5.5035	8.79592	4.26012	5.50906	3.34003	9.73337	16.2299
1W3a	1	10.8247	9.66068	7.2666	80.0073	6.70813	52.9699	3.78376	6.82179	6.31178	2.9473	19.144	77.7405	25.1252	6.73887	11.5499	111.371	3.31377	4.44288	42.7496	29.0473	9.67959	4.19104	8.17037	2.88665	31.3138	153.686	3.35524	20.6904	6.97793	5.21864	5.7708	7.26844	90.8493	4.67383	1.68426	5.18348	7.27446	1.98202	10.9914	45.2887	5.5759	9.37667	4.41182	6.0151	3.42065	9.60137	15.9368
1W3b	1	10.9293	10.0361	7.51156	77.9307	6.84158	53.4982	5.47654	5.5099	6.30052	0.436639	0.436639	83.6876	25.2985	7.57905	11.3988	116.98	3.32614	4.33859	43.7384	29.3332	10.1452	4.27362	8.37122	2.75652	31.6568	158.688	3.4779	20.953	6.81281	5.6781	5.68859	7.40349	88.9856	4.90799	1.91534	5.17484	7.32041	1.93182	11.1406	46.9504	5.53147	9.44031	4.29954	5.9775	3.2248	10.4719	16.2341
1W3c	1	11.1741	9.78419	4.96021	80.082	6.71578	53.8068	5.35303	6.76811	6.28872	3.03223	19.0975	80.0492	27.4526	7.30547	11.1182	113.942	3.31794	4.26791	43.087	28.4308	9.95687	4.16113	8.26389	2.94522	31.14	157.324	3.52923	20.6396	7.17188	5.39644	5.13255	7.12011	90.7334	4.67333	1.74051	4.51643	7.31662	2.07066	11.0702	38.6924	5.55755	9.29257	4.47769	5.90183	3.3794	5.58834	16.1748
2W1a	2	13.0814	11.469	5.34183	52.8553	7.29054	36.402	48.9842	10.985	8.76949	0.500753	23.8818	42.9535	39.0805	10.8697	8.12297	122.827	2.658	5.41478	35.8575	25.7646	9.20253	5.37352	8.18499	2.94196	34.0545	165.9	3.43123	15.266	8.17115	5.24071	6.5452	5.36113	97.7823	3.50611	1.83452	7.64773	5.0368	2.33261	7.81638	51.3527	4.24441	6.36637	2.99889	3.73827	2.94931	4.86124	14.7496
2W1b	2	14.9451	10.7089	5.18296	51.6074	10.5111	34.6011	49.3175	10.9377	8.79885	0.499765	23.3606	42.7426	33.6783	10.5937	7.87803	121.952	2.57758	5.12164	37.2152	25.4962	9.04255	5.62215	10.371	2.98545	33.4471	176.447	3.32585	15.1584	8.07306	5.22089	6.02302	5.65278	99.0433	3.90635	1.8588	7.05131	4.92709	2.36596	7.86151	42.3511	4.50517	6.55707	3.24148	3.96967	2.99492	5.38683	14.8846
2W1c	2	14.6001	11.4392	5.16503	53.5972	10.6542	35.4639	46.7414	11.385	8.93524	0.501317	21.5625	43.6322	35.7885	11.0902	8.0427	122.653	2.54954	5.2463	36.3782	25.7103	9.38513	5.45927	10.595	2.84424	34.1751	164.951	3.38513	14.7388	8.03396	5.06589	6.19043	5.05584	98.8418	3.61425	1.89974	7.79993	5.11628	2.33446	7.86783	50.7354	4.66379	6.27334	3.00121	3.69532	3.44112	5.10077	14.5988
2W2a	2	13.6413	11.1962	5.41839	53.5296	10.5225	34.2321	46.0239	11.3884	8.34956	5.11764	26.4346	43.6352	33.4472	10.4384	7.86884	120.265	2.74975	5.5951	37.6295	26.3186	8.50173	0.490281	10.0266	3.06028	32.7466	175.576	3.64505	15.4992	7.87326	5.46298	6.44806	5.63554	93.3292	3.85574	1.7442	6.57682	4.81499	2.42883	7.9501	49.7529	4.6111	6.20418	2.84538	3.64035	3.13327	5.47201	14.8736
2W2b	2	12.2411	11.616	5.47472	54.0697	11.2281	33.4157	47.2507	11.4239	8.00501	5.30262	24.1779	42.9554	35.4543	11.4072	8.05408	123.731	2.65448	5.66077	36.7292	26.4763	8.77357	5.75478	10.7593	2.98902	32.31	163.466	3.63036	15.6167	7.89916	5.63278	6.40552	5.61171	92.0868	3.95408	1.88119	7.15087	5.02561	2.30234	8.21671	50.4615	4.70348	6.16129	3.16092	3.69172	3.00563	7.14712	14.8731
2W2c	2	14.2244	11.3738	5.34981	56.5129	10.5587	34.6719	46.6448	11.5086	8.44954	5.55682	24.5655	43.7348	31.8741	11.473	8.04943	124.018	2.68701	5.78454	37.9504	26.1969	8.27705	5.8692	10.8079	3.14577	32.7657	163.946	4.2384	15.3305	7.49336	4.7733	6.30261	5.1746	98.365	3.64631	1.7489	7.30459	5.15734	2.34494	7.97362	42.4721	4.58463	6.07013	3.14587	3.56968	3.54935	8.10184	12.657
2W3a	2	13.3518	12.0064	5.0337	49.0976	10.5574	35.5235	45.4083	11.4349	7.98539	3.65779	27.7661	43.8823	37.507	11.7726	7.79047	120.964	0.505302	5.70533	38.7847	26.8213	8.97137	6.06677	9.52615	2.72965	31.8686	163.085	3.82466	16.0882	7.90207	5.18955	6.45361	5.08957	97.477	3.59824	1.88328	7.20748	5.07774	2.3102	8.06232	52.2772	4.38408	6.24602	2.96806	3.71127	3.07563	5.0355	14.3358
2W3b	2	14.4322	11.7628	5.2355	50.7875	10.2669	34.7023	44.7158	11.2071	7.78042	3.68888	25.1588	42.6997	33.7223	11.3069	7.67921	118.483	2.59018	5.8697	38.2112	26.2856	8.03388	6.10234	9.38211	2.57085	31.117	175.05	3.3462	16.0407	7.86122	5.46403	6.19812	5.64993	97.2707	3.70148	1.84235	6.23725	5.34718	2.36417	8.2138	50.9881	4.49886	6.60417	3.0929	3.87433	2.59035	5.17367	14.7987
2W3c	2	13.3875	11.8835	5.22458	54.7133	10.0005	34.9358	46.3374	11.3651	8.10604	3.7738	25.1926	43.2165	35.434	11.5089	7.9588	119.206	2.62046	5.57347	38.8556	26.6839	6.58706	6.13445	9.46135	2.60296	30.7927	162.222	3.36059	15.2889	8.11096	5.41261	6.03477	5.67965	98.2258	3.93978	1.92321	7.11198	5.12251	2.27855	8.27601	50.6502	5.0137	6.3105	3.04247	3.88951	3.29145	8.41834	14.8401
3W1a	3	12.744	13.1571	8.49057	109.459	0.430263	57.8158	23.2735	5.72452	7.24267	4.44699	18.155	71.3119	32.43	12.1547	6.60734	110.058	3.70697	4.82031	28.3392	22.8955	8.44934	0.430263	8.09852	2.50356	26.5145	153.91	3.16573	16.9157	6.41941	5.10979	5.60691	6.34555	80.0309	4.44037	1.96324	6.46314	7.9019	2.10745	11.0772	44.0732	4.9324	9.74905	4.00044	6.81482	2.39978	4.12953	13.1841
3W1b	3	11.8583	12.686	8.55881	120.304	8.21745	54.8015	22.3352	8.72452	6.84871	4.41735	15.6384	62.2878	32.5456	11.9852	6.4039	107.24	3.67768	4.4931	27.2398	21.846	8.32129	3.06291	7.81111	2.58962	28.0719	150.379	3.49132	16.6978	6.55816	5.1167	4.99325	6.62514	82.3119	4.28471	1.81627	6.19434	7.47839	1.92298	10.9574	44.2123	4.97869	9.41943	3.7984	6.45658	2.66525	5.44036	12.235
3W1c	3	12.0396	12.6318	8.29372	119.729	7.92063	57.7075	21.1535	8.74615	6.52827	4.57269	17.0297	69.4034	31.71	11.9168	6.50496	107.562	3.68481	4.37651	27.6513	21.5071	8.20199	3.07407	7.69401	2.4262	27.6457	149.471	3.14481	16.58	6.72041	5.22513	5.08651	6.90221	77.1086	4.33253	1.90702	6.20879	7.75664	1.93156	11.3093	41.0457	5.04036	9.80189	3.88149	6.83096	2.95906	3.99773	13.0468
3W2a	3	12.4535	12.6404	8.47069	118.793	7.71015	57.2995	20.791	8.41351	6.24241	5.37741	17.1072	71.4419	33.1466	14.5223	6.59105	111.339	3.74558	4.69328	28.8151	21.525	5.89883	3.14173	6.74124	2.28577	26.1782	148.343	2.90581	16.892	6.19043	5.01346	4.96054	6.49179	76.138	4.4094	1.40855	5.86739	6.96712	2.0487	11.0821	40.76	5.00282	9.67306	4.17736	6.71184	2.81627	3.75024	13.0256
3W2b	3	12.9794	13.1468	8.26905	123.657	7.79829	57.0593	20.8659	8.41166	6.48429	5.71717	17.034	72.6201	31.0537	13.2532	6.72734	112.729	3.82532	4.89511	27.541	21.9655	5.73826	2.95563	7.30055	2.403	26.6307	139.153	2.71524	17.6198	6.39328	5.04493	5.35452	6.93935	81.7344	4.42394	1.44214	5.81182	7.10646	2.06048	11.1417	34.1872	5.08572	9.79903	3.98176	6.91462	2.77412	5.92636	13.3296
3W2c	3	11.6075	13.1942	8.54142	123.31	7.61552	57.6434	20.8407	8.37982	4.61399	5.67465	17.3314	73.1995	32.2046	14.5572	6.85247	113.988	3.68639	4.84614	27.9119	22.3384	5.95731	3.07061	7.39164	2.27651	26.9166	139.267	3.03747	17.3289	6.17359	5.06965	4.92522	6.40441	83.455	4.26349	1.48722	6.10294	6.98001	1.96648	10.8657	34.8758	4.96392	9.41295	3.89694	6.53882	2.62506	3.62755	12.7822
3W3a	3	11.7479	13.0054	8.14836	123.022	7.74805	58.3321	21.2614	9.01414	6.41633	4.75966	17.2397	72.8054	31.0772	12.6547	6.61919	113.394	3.79973	4.57411	29.0298	21.692	7.32489	0.418966	7.15629	2.5229	26.9894	135.236	2.68745	17.1258	6.37867	5.05621	4.89646	6.94849	82.1393	4.60321	1.40823	5.87476	7.38211	1.98019	11.167	40.3744	5.04416	9.83271	3.95169	6.7013	3.00393	4.10012	13.3534
3W3b	3	11.9278	13.5463	8.58025	123.876	8.13038	59.4593	21.8503	9.00443	6.51895	4.83688	17.371	73.2902	33.8726	12.965	6.86466	113.452	3.77762	4.55309	28.6307	21.8386	8.23217	0.423006	7.29035	2.43712	27.3772	136.611	2.79796	17.4426	6.17893	5.0923	4.69042	6.9165	76.9742	4.30004	1.46371	6.08194	6.89819	1.88334	10.0055	40.1141	4.90288	9.39588	4.02445	6.70215	0.423006	4.21058	12.7841
3W3c	3	13.1852	13.1097	8.61272	122.842	8.15236	60.5227	21.9488	8.93482	6.52342	4.87452	17.5821	74.1931	34.7482	13.518	6.97238	115.38	3.98508	4.54527	12.5084	21.8108	8.16797	3.27039	7.45406	2.55393	28.0705	139.27	2.37279	17.4702	6.12194	5.63124	5.04748	7.08803	81.7034	4.93084	1.51881	6.12134	7.30306	2.08379	10.9775	32.989	5.09451	9.59347	4.11739	6.89557	2.633	4.16412	13.4055
4W1a	4	14.7184	0.504353	3.1763	36.7602	8.16246	44.6187	6.70467	8.06053	8.6516	4.21955	22.3948	15.7954	45.0698	12.0629	7.02966	74.1384	1.89525	6.82014	57.5925	37.3644	9.51778	4.89935	9.93932	3.05974	35.5056	206.124	3.49296	15.5407	7.56856	5.13139	6.28513	8.50482	114.303	5.26486	1.64562	6.07878	8.63123	1.84956	12.8742	54.385	6.22022	11.1617	5.07101	7.5526	2.87328	11.0888	19.6903
4W1b	4	14.8063	0.529091	0.529091	13.3639	8.44714	45.4916	6.52388	8.15356	8.97421	4.66593	22.8466	16.4714	41.6472	12.5918	7.37842	76.7011	0.529091	6.91441	60.2717	38.871	10.0687	5.11761	9.69392	3.17133	34.9669	216.811	3.34037	16.1782	7.94889	6.57534	6.11861	9.49477	114.216	5.83904	1.57432	5.61414	9.32879	2.18488	13.7709	57.7461	6.67346	12.1156	5.57106	8.48945	3.19368	7.18171	21.3071
4W1c	4	14.1623	0.514947	0.514947	38.7554	8.34817	45.277	7.15567	8.04057	8.52251	4.36562	20.9206	15.8604	43.3222	12.5545	6.97373	75.8544	0.514947	6.5663	59.5476	38.211	9.79369	0.514947	9.67271	3.13718	35.8766	209.599	3.28999	15.6193	7.76401	6.24505	6.56799	9.37091	114.614	6.00649	1.50728	5.21238	9.08789	2.17487	13.0411	53.8875	6.48243	11.6024	5.15489	7.527	3.05253	6.91121	20.3036
4W2a	4	15.955	4.4346	0.512914	37.4244	8.76873	43.6304	7.32718	8.40511	9.22516	4.25043	22.3702	19.1848	40.6851	12.6588	6.8742	73.5636	0.512914	7.29623	58.1541	38.2539	8.20342	5.22285	10.1059	3.05112	35.163	206.611	3.80523	15.6416	7.88156	4.96259	6.2997	8.89928	110.5	5.5872	2.0843	6.12913	9.35589	2.25298	13.1727	54.3069	6.23815	11.4724	5.22367	7.30827	2.54071	8.58746	19.9046
4W2b	4	13.8002	0.516658	0.516658	38.0445	8.82401	44.5209	7.24964	8.41527	9.50461	4.29675	22.5789	20.5317	43.2665	12.5536	6.94985	73.1508	0.516658	7.55274	59.0667	38.0817	8.03399	5.37684	10.5386	3.09627	35.8785	207.96	3.54203	15.2538	7.66256	6.21232	6.0346	8.8677	104.403	5.71281	2.02082	5.32784	8.74961	2.12061	13.148	54.9721	6.35729	11.4146	5.42519	7.61555	2.97385	11.8101	19.5532
4W2c	4	16.0945	4.34394	0.516565	38.028	8.96212	45.3178	7.23605	8.49042	9.66215	4.32355	22.2233	15.6798	44.3826	12.2724	6.83291	74.3177	0.516565	7.15167	58.3919	38.2304	8.48365	5.01134	10.3879	3.05824	35.9408	204.99	3.43216	15.0752	7.63021	5.99991	5.64818	9.26552	112.116	5.98087	2.09504	4.49892	8.62027	2.18418	12.8322	53.771	6.35046	11.3349	5.2169	7.87368	2.56047	7.19334	19.4747
4W3a	4	15.3467	4.79898	0.51652	39.0842	8.85456	46.3047	7.20402	8.3738	9.50273	5.34105	21.97	15.9702	41.9698	12.1486	7.26524	77.4677	0.51652	6.60967	58.3575	37.5496	8.73187	5.14922	10.5292	2.96364	35.5806	206.609	2.9113	16.0954	7.26209	5.6946	6.33125	9.27569	110.438	5.39763	2.21322	5.07818	8.34725	2.15111	11.9535	52.3814	6.41025	11.3349	5.1933	7.33811	2.79016	6.84354	19.8436
4W3b	4	13.7609	4.6108	3.1327	28.6539	8.45209	44.7401	6.84803	7.91774	7.79309	5.28418	24.9572	20.7434	41.5916	12.4688	7.21607	76.2181	0.508867	6.72684	59.4522	37.8085	8.64591	5.36344	10.0537	3.02103	34.9907	210.014	0.508867	15.8617	7.69238	5.86274	6.12105	8.24118	113.312	5.28247	2.18366	6.026	8.67439	1.87625	12.4759	57.0677	5.59844	10.9481	5.01383	7.23061	3.2131	5.93399	19.9018
4W3c	4	14.7525	4.51323	0.505612	36.3111	8.40248	43.9943	6.81515	7.78992	8.72969	5.35938	22.4616	20.3664	43.2624	12.2904	7.08997	74.0688	0.505612	6.71253	59.1618	38.0583	8.58898	4.88842	9.971	2.88345	34.5275	207.419	3.08049	16.5108	7.67483	5.90131	5.94294	8.61486	109.661	5.71936	2.0404	5.84909	8.63278	2.07296	13.076	53.1219	6.04483	10.0097	5.06337	7.34845	3.2817	10.9882	19.9353
5W1a	5	15.223	0.543438	0.543438	34.6473	7.40803	35.9096	5.24741	6.71251	8.19165	5.17364	20.2462	40.8943	42.2108	8.02433	6.37409	77.1143	5.39642	4.71427	37.7712	30.4101	9.89709	0.543438	10.8888	3.02234	36.0074	213.229	5.33314	11.6207	8.47352	7.46027	7.23698	10.6439	116.828	7.07344	1.80735	0.543438	11.5357	2.44606	16.1735	59.3999	7.36121	13.3851	5.87356	9.28003	3.30739	8.32257	19.55
5W1b	5	15.108	4.65483	0.544957	36.1529	7.76283	36.6795	5.13905	4.15612	8.16589	5.58581	20.3307	41.4649	37.5043	8.14567	6.4406	76.8678	5.68127	0.544957	41.7191	30.4467	10.2522	0.544957	10.6127	3.01417	35.9454	209.157	5.01832	11.5282	7.4809	7.58238	6.69715	11.3452	116.262	7.57906	1.90791	4.10558	10.8288	2.33807	15.5428	58.9235	7.0534	13.9409	6.36781	9.51159	0.544957	13.2186	19.6007
5W1c	5	16.5272	0.56453	0.56453	29.3369	7.87853	38.8142	6.02191	7.21112	8.50996	6.04697	20.2262	37.6944	39.663	8.45292	6.50053	81.6322	5.81921	4.62553	11.2197	31.2778	10.7176	3.55007	10.7623	3.3112	36.5676	226.779	5.20277	7.14547	8.77903	7.53886	6.72422	11.7539	113.815	7.38127	1.93074	5.41199	11.5399	2.77331	16.7601	60.8	7.45111	14.4319	6.1514	10.0493	3.15521	9.42364	21.5051
5W2a	5	17.1042	0.57477	0.57477	20.4767	7.72162	37.1366	0.57477	6.98292	8.20037	4.65584	21.3394	43.4206	39.7487	8.3957	6.80024	79.2359	5.61869	0.57477	44.1966	31.8574	8.07464	0.57477	9.97868	3.33946	33.862	225.883	5.55677	11.9012	0.57477	8.48607	7.26626	12.4315	98.019	8.10211	1.57573	5.05111	12.4674	2.60776	18.4183	62.0332	8.08569	17.1004	6.98492	12.0223	3.45892	9.47681	21.4773
5W2b	5	16.3408	0.563574	0.563574	30.195	7.43919	36.1604	5.27256	6.8128	8.14073	4.8787	20.4962	41.6753	37.2151	8.2058	6.37494	64.8767	5.51194	4.45076	42.1891	31.7441	8.21148	0.563574	10.5735	3.08489	36.1991	216.568	5.424	11.5143	7.78626	7.84218	7.32233	12.0186	111.737	7.35794	1.67128	4.96501	11.7321	2.02364	17.475	62.8332	7.67263	15.8833	6.58622	11.4929	3.24692	9.1487	19.9594
5W2c	5	17.5695	4.58504	0.575407	34.1182	0.575407	37.3392	5.49012	7.11599	8.11323	4.70401	20.714	40.5169	0.575407	8.1825	6.58787	79.1441	5.79823	4.41264	44.467	33.1341	8.8229	0.575407	10.7093	3.11637	37.2123	224.413	5.37852	11.5966	7.93749	8.41553	7.50325	12.6245	117.241	8.30141	0.575407	0.575407	12.485	1.99601	18.4127	63.5949	7.927	16.7717	6.9216	12.152	0.575407	9.11379	21.3329
5W3a	5	15.9037	0.556078	0.556078	34.1622	7.62781	36.1138	5.4822	7.15246	7.84824	6.02602	0.556078	42.7389	41.5775	8.30455	6.37276	79.6587	5.45605	0.556078	42.9094	31.1594	10.6428	0.556078	10.3225	3.13027	36.9928	217.573	3.92784	12.0297	7.73327	7.8594	6.77235	11.7702	113.056	7.797	1.6172	4.35715	11.2732	2.42246	16.4473	60.1204	7.55989	14.8788	6.648	10.0979	3.23084	9.05191	21.4134
5W3b	5	15.7467	0.540092	0.540092	32.2969	7.33719	35.2211	5.3398	6.6934	7.92128	5.48715	19.8075	41.071	38.9059	7.94669	6.23932	77.232	5.38333	4.21418	40.7228	30.1872	10.5781	0.540092	10.061	3.05801	35.9056	215.244	5.09074	11.5533	8.14295	6.02658	6.68573	11.1025	115.001	7.687	1.51781	5.04244	11.3594	2.59617	16.3209	59.5776	7.4096	14.3889	6.25208	9.87874	0.540092	8.96493	20.6415
5W3c	5	15.5492	0.532083	0.532083	32.899	7.409	34.7091	5.31492	6.45789	7.93544	5.56255	19.9928	41.1487	41.8572	8.11188	6.0086	77.3787	5.3887	4.23275	41.6228	30.4845	7.2263	0.532083	10.0926	3.03908	34.0429	214.368	5.01828	11.5436	8.45746	7.43554	6.91937	11.3525	110.29	7.29804	1.5913	5.37273	11.7672	2.70638	17.0379	58.7842	7.55786	14.4974	6.29479	10.1412	3.65182	8.79157	21.0618
6W1a	6	17.1518	5.68972	4.57495	45.6291	8.98362	43.3403	0.571216	11.5875	8.34879	4.90414	22.6809	10.1746	39.0106	10.0019	7.76037	47.7145	2.77031	10.2101	51.1304	34.4671	9.35978	4.42549	10.6932	3.25966	38.6805	212.435	3.98496	12.8034	8.08578	6.98801	6.8422	10.8419	128.198	6.69289	0.571216	5.35224	9.72596	1.41321	11.8987	63.1593	5.05057	9.35671	4.06345	5.90517	1.81643	12.8633	18.8316
6W1b	6	15.6968	5.32363	4.58027	46.1592	8.62731	40.3719	12.5728	11.5022	8.24429	5.37555	22.4424	9.43599	44.4592	10.1293	7.91259	47.1618	0.566726	10.7281	51.3754	33.7619	9.40694	4.43287	10.9764	3.03697	37.8121	215.957	4.00447	8.84619	8.31393	7.10219	6.805	10.3044	127.41	6.69995	1.97511	0.566726	9.6568	1.57866	11.8923	62.8868	5.63126	9.60549	4.0894	5.87794	1.66306	8.03813	19.0026
6W1c	6	17.3254	5.4555	4.5374	46.8227	8.86409	44.3894	12.8415	9.46937	8.42659	5.38653	24.0693	10.4846	40.2105	10.1686	7.83994	47.4218	2.73607	10.1749	46.1618	34.1236	9.66128	4.50945	11.2961	3.16718	38.0805	211.965	4.16367	12.5222	8.28454	6.84192	6.59807	9.81993	123.487	6.40577	1.9137	5.45775	9.29149	0.569279	11.2794	62.5765	5.50269	9.07454	4.1007	5.75013	0.569279	12.3583	17.844
6W2a	6	16.8882	5.30284	4.52561	43.7914	8.77021	40.5005	12.9266	11.5974	8.20727	5.52004	22.9289	10.6283	36.6701	10.0481	7.88084	47.6176	2.70017	11.5903	50.653	34.6517	8.64697	4.6451	9.96114	3.08692	37.0766	219.357	3.95809	12.9662	9.08821	7.05052	7.14251	9.91049	130.123	6.77129	0.580384	7.06951	9.82504	0.580384	11.7009	54.9486	5.48959	9.17038	3.83264	5.94584	1.82668	7.32664	18.5196
6W2b	6	16.4158	5.72384	0.583215	45.8632	5.84206	43.4736	12.7628	11.6737	8.65778	5.56507	23.1742	10.1814	38.962	9.8686	7.62708	47.9367	2.89058	10.5498	50.4426	34.9936	9.18698	4.66124	10.5407	2.95983	36.9712	219.044	3.67292	12.8143	8.75572	6.92107	7.14783	9.95758	115.58	6.71392	0.583215	6.42814	10.1036	1.59278	11.8585	66.1375	5.68977	9.3526	4.07624	5.87928	1.96096	9.6102	18.6124
6W2c	6	16.9505	5.36447	4.479	45.0702	8.94193	42.394	12.8242	11.7802	8.20412	5.31165	20.4961	10.5009	41.569	9.60517	7.59874	45.4079	0.578179	10.9985	51.3068	34.469	9.22146	0.578179	10.4765	3.02121	36.1705	209.148	4.44175	13.046	9.61574	7.00914	7.32201	10.4672	129.292	6.51703	0.578179	7.59994	10.5034	1.75337	12.9529	61.9603	5.73064	9.68905	3.82047	5.93065	1.92495	7.72791	19.6507
6W3a	6	17.0852	0.58465	4.40128	44.411	8.94745	44.34	12.6995	11.748	8.42601	5.55489	21.3493	9.54198	43.7199	10.043	7.66449	47.4554	2.7378	10.6953	50.6687	34.7655	9.17177	0.58465	7.15778	3.32288	37.7736	215.078	4.07466	12.8236	8.5652	7.24508	7.03484	10.2729	127.879	6.42305	1.68264	6.10974	9.38261	1.48414	11.5337	64.637	5.19095	8.91307	4.01742	5.54126	1.8288	7.36114	18.071
6W3b	6	18.7808	0.585865	4.65193	45.672	8.87895	43.4175	13.0314	11.8098	8.44449	5.57897	24.0726	10.205	42.7236	10.0804	7.50649	47.1574	2.85682	10.8286	49.3714	34.6165	9.19908	4.74629	10.4453	3.19882	36.2937	204.912	4.08111	13.0984	9.30309	7.23483	6.83274	10.4792	121.814	6.31585	1.64582	6.35666	10.2233	1.98519	12.1705	65.65	5.50334	9.2911	4.41765	5.83574	1.83379	7.80317	19.0588
6W3c	6	16.9842	5.83675	4.50007	44.1268	8.74866	43.1301	12.6998	11.8374	8.24197	5.367	23.5222	10.2649	40.8304	10.1712	7.57748	47.5947	2.58614	11.3948	50.5896	34.7549	9.6406	4.71662	10.8385	2.97903	37.6315	198.996	4.63635	12.8438	9.18185	7.15157	6.7586	10.4873	129.333	7.15085	1.76304	5.88912	9.69015	1.50316	11.8741	65.1158	5.5185	9.31962	3.96995	5.74342	0.582533	7.22302	18.7027
7W1a	7	17.9868	7.62523	0.576158	43.6972	7.8582	57.3726	11.9531	9.89346	7.37195	0.576158	21.8442	12.3805	44.1296	5.75977	5.44927	41.6717	0.576158	7.32115	51.3848	35.2866	9.36786	4.21901	10.5662	3.17065	29.3875	207.879	4.65058	8.6099	8.50619	7.54639	7.29326	10.4531	128.279	6.63302	0.576158	5.30189	9.96421	2.20744	13.8027	67.1581	7.08375	10.8851	5.86034	6.56848	2.9137	9.52608	20.8752
7W1b	7	17.7884	0.563053	0.563053	41.7768	0.563053	55.1845	10.7186	9.6555	7.40575	0.563053	22.068	14.0913	42.9731	5.71503	5.16834	41.821	2.3741	7.53284	50.532	34.6199	6.64576	4.1852	11.1538	2.98697	31.9661	227.549	5.34392	8.53865	9.01266	7.11634	7.00169	10.0942	125.057	5.37407	0.563053	6.14301	10.3091	2.61688	13.7629	65.8238	6.94965	10.8722	5.20736	6.6061	3.11196	13.7772	20.5543
7W1c	7	17.602	0.57278	0.57278	41.5252	7.90651	60.6891	11.2355	9.91603	7.32921	0.57278	22.0019	12.2887	42.9534	5.64065	5.24862	41.3848	0.57278	7.08554	49.6405	34.1577	9.2133	4.07214	11.0272	2.99564	31.4844	222.017	4.82089	11.4048	8.42949	7.46009	6.34885	10.506	126.108	6.90679	0.57278	4.94099	9.96888	2.1918	13.2737	65.555	6.90339	11.0386	5.89821	6.57251	2.91514	8.32906	20.1495
7W2a	7	18.2714	0.584812	0.584812	39.7209	7.58584	55.0811	11.1489	9.96276	7.47755	4.0022	23.048	12.2165	45.9646	5.48657	5.08924	41.5398	0.584812	7.32078	45.3714	34.8781	8.87041	4.18002	11.2828	2.8493	36.4003	224.622	5.16732	8.40819	8.62916	5.70697	7.04696	10.7012	120.714	7.11815	0.584812	4.10855	10.2923	2.29792	14.3273	67.4525	7.07442	11.3203	5.7583	7.18153	2.82698	9.54795	19.6096
7W2b	7	18.5122	7.54223	0.595814	41.3141	7.6805	56.08	11.1213	10.0523	7.4874	0.595814	0.595814	13.9614	49.2895	5.40973	5.22433	42.1635	2.39661	7.3675	50.5474	35.5047	11.6344	0.595814	8.62893	3.23734	35.2	212.93	4.53368	11.6916	8.91334	6.82882	6.92404	11.0442	130.243	7.56933	0.595814	0.595814	10.5179	2.38467	14.6369	68.8162	6.97214	11.6566	5.80273	7.56369	3.2949	12.9837	20.7626
7W2c	7	16.1436	7.30634	0.5758	43.85	7.66105	54.3486	10.8669	6.92407	7.18173	2.76333	23.1852	11.9339	46.3042	5.32583	5.09904	41.0322	0.5758	7.37084	48.8109	34.3981	11.3376	0.5758	10.9837	3.10412	35.6135	205.536	5.3677	11.1173	9.08339	7.4149	7.16079	10.1068	125.875	6.68976	0.5758	5.71646	9.95687	2.65746	14.2311	66.9218	6.86423	11.3338	5.53214	7.31118	3.21685	14.2863	19.7731
7W3a	7	16.8451	7.10491	0.587393	44.4857	7.45901	55.4621	9.16327	9.53487	0.587393	0.587393	23.3796	11.7447	47.1908	5.59224	5.07315	40.677	2.38181	7.10347	50.0069	34.8901	0.587393	4.1297	10.1721	2.82669	34.335	207.467	5.17241	7.93034	8.52688	8.11959	7.12948	10.67	129.387	7.30438	0.587393	4.95261	10.7067	2.30789	14.888	68.7021	7.06613	12.6094	6.00975	8.0393	3.27774	17.633	19.6049
7W3b	7	17.5859	7.39486	0.57475	38.2457	7.34356	54.245	11.198	9.30567	6.59785	0.57475	22.6031	11.8184	46.1401	5.64987	4.83741	38.7444	2.4004	7.37054	48.7126	34.4473	10.2447	4.12005	9.43038	2.90649	30.8734	220.631	5.39553	8.18684	8.9151	7.48121	7.23336	10.1298	126.048	7.03192	0.57475	5.56891	10.6534	2.58368	14.6036	62.7899	6.88976	12.1007	5.62136	7.95992	2.83144	14.2271	19.1779
7W3c	7	17.9861	0.582843	0.582843	45.709	7.2117	54.2175	11.2752	9.65719	6.74876	0.582843	21.3583	11.796	42.7204	5.64927	4.88925	40.986	0.582843	7.23557	49.5806	34.3426	10.7076	0.582843	9.74569	2.84532	34.5396	220.286	5.35868	10.894	8.64517	7.46008	6.65167	10.47	128.298	6.4848	0.582843	5.36976	10.6133	2.50905	14.6292	66.3867	6.33664	12.1646	5.74117	7.85023	3.10902	8.84791	19.1951
QC1	QC	15.3449	11.2866	5.81029	68.2849	9.22165	36.0306	23.0863	9.02834	9.51339	4.81265	22.4121	34.4375	36.8184	10.1956	10.0619	76.7846	2.81048	5.79284	43.5292	30.5048	5.38318	4.67426	6.64518	2.53353	27.937	183.473	4.40198	17.6272	7.5994	6.27223	6.99637	9.61126	102.9	6.15344	2.09521	5.48563	9.07422	2.37154	12.7745	52.7605	6.62424	11.1914	5.19382	7.50489	2.81022	7.59969	16.5397
QC2	QC	15.2517	11.7187	5.64355	64.1888	9.42053	36.9755	21.1315	9.1687	9.74	5.25774	22.5397	34.2879	36.9837	10.0775	9.7158	87.7481	3.68264	5.68795	42.7972	30.3641	5.38039	4.50817	6.91146	2.40504	28.3617	185.532	4.18634	17.513	8.13488	7.29583	6.72316	9.30125	90.9694	6.3257	2.20716	5.73024	8.93679	2.2974	13.2679	53.5443	6.62235	11.5378	5.17612	7.67189	3.40138	7.0142	16.6629
QC3	QC	16.0373	11.7461	6.2013	72.0847	9.8413	39.4803	21.325	9.18848	9.71207	5.55486	21.983	34.5704	37.1559	10.0757	10.2078	78.8138	3.90648	6.22299	42.6993	30.2612	5.99647	4.67867	6.92566	2.37879	27.953	190.724	4.39477	17.6688	8.37407	6.52773	6.56598	9.01445	82.1876	5.77295	2.11481	6.5099	9.39155	2.45516	12.9369	54.2318	6.17725	11.2983	4.86058	7.34992	2.8764	7.22604	16.3409
QC4	QC	16.4304	12.7813	6.15241	65.8125	9.87586	40.4016	23.0699	9.60742	9.84509	5.67282	22.6711	35.2105	36.2521	10.3646	10.3947	76.4298	3.82085	6.08355	43.5746	30.8866	5.67894	4.58442	7.20136	2.39142	28.6855	173.021	4.27011	18.4122	8.12541	6.87196	6.60287	8.13991	103.126	5.76585	2.42757	6.06621	9.04567	2.30923	12.9402	54.1549	6.25865	10.859	4.9095	7.30644	3.08666	6.58364	15.8375
QC5	QC	15.5778	12.6236	5.96042	73.2637	9.791	40.4579	23.2801	9.41606	9.90127	5.25524	21.9884	34.4031	32.6944	9.62328	10.4295	82.3629	3.85923	5.85869	41.9359	30.7018	5.7329	4.54966	7.31691	2.48417	28.2271	183.534	3.78678	16.661	7.82363	6.67766	6.54389	9.04641	96.4416	5.55156	2.17454	5.66049	8.35697	2.4014	12.0539	50.5937	6.29652	10.9011	5.00622	7.39495	2.88738	6.4686	16.0428
QC6	QC	14.3198	12.8533	6.1043	70.1826	9.98153	38.2004	21.4776	9.48946	9.52776	5.24489	22.5807	34.5055	32.9599	10.4528	10.0944	87.0567	3.72163	5.95373	42.8229	29.8808	5.68329	4.50947	7.69016	2.39217	28.5886	171.136	4.3488	16.8055	8.07706	6.73316	6.68066	9.23401	103.557	5.83059	2.38209	5.7806	8.93303	2.2733	12.7343	53.094	6.32408	11.1283	4.77259	7.29588	2.99658	7.13457	16.474
QC7	QC	17.0081	12.7589	6.31761	68.9681	10.2435	41.116	22.7154	9.65055	9.78042	4.94652	22.6766	35.393	37.6699	10.1303	10.259	89.323	3.76116	6.2631	36.8958	30.5833	5.75596	4.51452	7.18258	2.4246	29.0277	181.806	4.74414	17.8224	8.24195	5.7869	6.82265	8.38619	84.8142	5.56541	2.34851	6.2059	9.35509	2.56178	12.8492	54.0958	6.03557	10.5923	4.82606	6.99853	2.78759	6.00382	15.9845

## Sheet: Table S2
Table S2 Normalized data for metabolomics study of MOR in different tissues
Sample	Tissue	Year(s)	238.0288/10.35	253.0525/10.35	255.2349/11.56	267.06825/10.46	279.2351/11.37	281.2507/11.61	283.2664/11.99	295.2299/10.75	327.2925/12.12	341.1113/1.22	373.1166/7.11	389.1115/2.87	417.1064/4.69	431.1224/8.16	443.25/11.49	459.11735/9.06	469.0685/1.78	476.1071/9.07	503.1646/1.25	535.1697/9.57	549.1705/1.26	583.2833/9.76	665.2185/1.53	711.22395/1.53	713.4773/9.93	723.5063/9.93	760.24225/2.36	809.4535/9.93	827.2717/1.95	841.2687/2.52	845.2797/1.24	873.27785/1.97	899.2927/2.69	922.2954/2.69	932.2979/2.37	980.3194/2.81	989.3251/2.13	1003.322/2.81	1013.3245/2.49	1035.6217/10.02	1046.32975/2.29	1061.3458/2.97	1094.3509/2.71	1142.3726/3.08	1175.37735/2.82	1223.39895/3.18	1256.404/2.95
1C1a	C	1	1.39784	4.77194	2.02763	4.98616	-2.04226	1.60106	2.02551	-2.04226	1.12597	3.67724	4.8841	7.89617	3.08809	6.06463	1.63961	3.95214	1.82878	1.06327	4.74909	-2.04226	4.29071	-2.04226	6.58914	5.78937	0.487783	0.783773	2.28665	3.6764	6.78385	1.57119	3.46599	4.65503	2.09152	2.18752	2.05014	2.69212	5.87235	2.03268	0.635287	0.842145	1.78714	2.81158	0.72711	3.39568	2.15648	3.22258	1.91158
1C1b	C	1	1.43569	4.40061	2.11353	5.00864	-2.01402	1.65677	2.03129	-2.01402	1.33027	3.71177	4.89455	7.88511	3.2412	6.06799	1.87661	3.99102	1.71019	1.06285	4.75892	-2.01402	4.30943	0.475624	6.57506	5.81013	-2.01402	0.723964	2.27763	3.68696	6.87048	1.63114	3.42329	4.67336	2.09264	2.20106	2.07076	2.64532	5.92738	2.02321	0.805504	0.823167	1.71182	2.73477	0.590644	3.33119	2.27564	3.19166	1.87764
1C1c	C	1	1.46461	4.87666	2.08297	5.03364	1.20824	1.71533	2.04036	-2.0427	1.37515	3.61517	4.86645	7.84671	3.1887	5.92563	1.997	3.9605	1.71553	1.06716	4.77298	-2.0427	4.24391	-2.0427	6.58741	5.81109	0.919342	0.809258	2.36251	3.65689	6.89786	1.56537	3.45358	4.6622	2.09555	2.20144	2.05201	2.67523	5.84872	2.09315	0.430185	0.740522	1.66388	2.77492	0.768687	3.35981	2.02683	3.22131	1.73462
1C2a	C	1	1.4184	4.88071	2.15442	5.09325	1.29504	1.72886	2.03799	-2.04893	1.29126	3.60698	4.81068	7.87942	3.15769	5.90171	2.21765	3.93914	1.78251	-2.04893	4.72946	-2.04893	4.28388	-2.04893	6.55662	5.76801	0.914337	0.734433	2.3369	3.64897	6.87417	1.63073	3.42318	4.62346	2.05792	2.21091	1.98182	2.64099	5.865	2.00094	0.415223	0.812414	1.8099	2.84803	0.787159	3.41506	1.93577	3.23704	1.98238
1C2b	C	1	1.45823	4.92918	2.15235	5.06147	-2.01647	1.76354	2.03053	-2.01647	1.35604	3.62346	4.86913	7.85516	3.19781	5.91282	2.30712	3.97959	1.85545	1.13784	4.73372	-2.01647	4.29684	0.510645	6.58908	5.7886	-2.01647	0.757323	2.86775	3.64536	6.74727	1.52977	3.45315	4.61281	2.15347	2.22715	2.05693	2.74644	5.89165	2.10024	0.870379	0.828973	1.47833	2.78766	0.603129	3.40304	2.22822	3.28507	1.9432
1C2c	C	1	1.46858	4.97267	2.14527	5.12752	-2.06051	1.82184	2.07107	-2.06051	1.29845	3.57418	4.79731	7.89953	3.12805	6.01295	2.28892	3.90841	1.81298	1.08246	4.6587	-2.06051	4.25386	0.469939	6.54147	5.75329	0.928323	0.713141	2.69629	3.62714	6.84921	1.61212	3.32685	4.61585	1.98094	2.11469	1.92089	2.63648	5.84104	1.93259	0.378083	1.04616	1.90816	2.80994	0.879518	3.34735	2.0991	3.18635	1.84039
1C3a	C	1	1.60363	5.032	2.18234	5.18571	-2.02058	1.73521	2.03868	-2.02058	1.16076	3.6373	4.79099	7.90508	3.17791	6.00851	1.27836	3.85524	1.8821	1.05525	4.75016	-2.02058	4.3093	0.284191	6.55234	5.8062	0.834826	0.651502	2.22262	3.56718	6.75689	1.63562	3.45579	4.63174	2.14403	2.27161	-2.02058	2.63761	5.8801	1.98452	0.664362	0.642412	1.89088	2.83559	0.702199	3.35393	2.15307	3.20745	1.92358
1C3b	C	1	1.56535	4.93024	2.10126	5.15695	1.29114	1.73911	2.10294	-2.0233	1.20734	3.6161	4.81605	7.86952	3.12077	6.00631	1.18441	3.95734	1.76316	1.15019	4.75719	-2.0233	4.33024	0.291751	6.52379	5.7625	0.89253	0.64788	2.24892	3.53837	6.82117	1.56757	3.42273	4.5717	2.06818	2.18503	1.99585	2.64462	5.88989	2.01536	0.927159	0.677716	1.6454	2.70984	0.547596	3.29839	2.22186	3.19937	1.98094
1C3c	C	1	1.54813	4.87869	2.21245	5.21649	-1.98896	1.22893	2.09528	-1.98896	-1.98896	3.68648	4.83917	7.85809	3.1764	6.04808	1.21635	3.99352	1.851	1.21995	4.77995	-1.98896	4.35217	0.277605	6.57805	5.84166	0.868619	0.639973	2.3644	3.57762	6.86685	1.61499	3.39257	4.65138	2.19458	2.26603	1.86586	2.74238	5.70553	2.12244	0.84089	0.730576	1.5701	2.8185	0.739352	3.38161	2.21982	3.27133	1.99713
1X1a	X	1	0.815985	4.93799	2.90681	3.57191	3.51018	2.07392	3.4372	2.42622	-2.21613	3.95532	4.94329	8.51759	3.30728	5.91273	-2.21613	4.5788	1.53796	-2.21613	4.62517	1.02056	4.08622	1.99793	6.07088	5.42094	1.83801	1.80134	1.93993	4.11423	6.38025	0.696385	4.03853	4.27982	0.755957	0.873345	1.6813	0.887053	5.66321	0.0322986	-0.238846	-0.0396645	1.80911	0.699799	-0.336997	1.39621	0.602697	0.92434	-0.225802
1X1b	X	1	1.48741	4.93737	2.95439	3.62742	3.39924	2.05138	3.45846	2.35315	1.29267	3.90708	5.06629	8.34323	3.42281	6.15602	-0.0228869	4.70748	1.5183	-2.10603	3.44492	1.13949	4.20069	2.08637	6.23297	5.51141	1.93142	1.85393	2.35354	4.08785	6.58976	0.681794	4.13996	4.32661	0.849505	1.09599	1.76939	0.941795	5.63477	0.490996	0.109908	-0.108317	1.79245	0.303571	-2.10603	1.39749	0.86044	0.966088	-0.0895998
1X1c	X	1	1.48835	5.01262	2.95959	3.65319	3.57445	2.10171	3.50617	2.36388	1.26506	3.82493	5.07353	8.32045	3.42426	6.0499	-2.08238	4.42827	1.60871	-2.08238	4.75541	-2.08238	4.22101	2.14517	6.08115	5.60746	2.01782	1.85022	1.88703	4.21654	6.48717	0.733398	4.15331	4.35627	0.894362	1.04138	1.73598	0.89615	5.79978	0.286918	-0.0175451	0.0276154	1.88905	0.724093	-0.402071	1.41012	0.570865	0.823717	-2.08238
1X2a	X	1	1.4148	4.83101	2.86932	3.50675	3.46957	2.02669	3.34008	2.25962	1.12472	3.67884	4.96677	8.5288	3.31821	5.92709	0.595785	4.5917	1.43023	-2.24719	4.56317	1.05626	4.04993	2.34795	6.03044	5.44214	1.6613	1.53772	2.04464	4.19024	6.47917	0.682347	4.01652	4.21318	0.376999	0.846453	1.56482	0.696279	5.62656	0.120043	-0.211198	-0.0558412	1.77222	-2.24719	-0.347257	1.20075	0.635867	0.782877	-0.275301
1X2b	X	1	1.59214	5.03788	3.15003	3.68071	3.75798	2.27164	3.64122	2.56187	1.45045	4.0118	5.2536	7.99026	3.61223	5.68212	0.846903	4.82049	1.71976	1.5041	4.93639	1.30199	4.39408	2.57579	6.37488	5.70118	2.28304	2.19725	2.00884	4.33086	6.67522	1.03254	4.34846	4.55454	1.10592	1.25901	1.83451	1.16055	5.74991	0.260375	0.200128	0.17019	1.88953	0.753873	0.0701181	1.57032	0.887678	1.08003	0.203555
1X2c	X	1	1.36024	4.74546	2.82707	3.47595	3.44591	1.3409	3.32282	2.33406	1.25918	3.73045	4.96277	8.4879	3.2853	5.91998	0.613468	4.59861	1.52294	1.10435	4.63772	1.02828	4.06924	2.29337	6.12556	5.42159	2.09933	2.02433	2.12006	4.18821	6.50216	0.619374	4.03462	4.28309	0.71312	0.904603	1.58137	0.79369	5.69766	-2.24468	-0.319996	-0.105262	1.81276	0.368338	-0.314663	1.30176	0.640162	0.89962	-0.0962956
1X3a	X	1	1.47985	4.84802	2.93253	3.57633	3.55229	2.10279	3.50152	2.34554	-2.05873	3.87919	5.02505	8.25882	3.43761	6.12146	0.242416	4.72693	1.63637	-2.05873	4.77823	1.14338	4.25337	2.08712	6.21142	5.62438	1.93701	1.86837	1.90607	4.07299	6.51093	0.62893	4.14429	4.41697	1.05017	1.21625	1.74533	1.11122	5.86938	0.503153	0.0285163	-2.05873	1.88905	0.773753	-0.146761	1.53678	0.856909	1.09367	-0.232377
1X3b	X	1	1.46558	4.98917	2.97693	3.65315	3.60205	2.10207	3.46601	2.48291	1.38989	3.93908	5.07288	8.32303	3.46494	6.06376	-2.0359	4.763	1.72981	1.37996	4.76135	1.25738	4.30955	2.16373	5.19815	5.66559	2.13362	2.00979	1.91891	4.26386	6.65195	0.900559	4.14366	4.47596	0.522818	1.14832	1.783	1.03564	5.85265	0.188974	-0.150328	-0.103555	1.98726	0.916475	-2.0359	1.61204	0.842355	1.1582	-0.256334
1X3c	X	1	1.53335	5.09165	3.05183	3.61553	3.68309	2.13946	3.54729	2.40896	1.48613	4.02101	5.09283	8.25723	3.46225	6.24563	0.205607	4.77791	1.66859	1.32221	4.7648	1.26065	4.25972	2.12358	5.27215	5.68619	2.01529	1.96694	1.8474	4.26069	6.63177	0.884565	3.84592	4.41379	0.899225	1.17391	1.79497	1.0219	5.90906	0.236054	0.115323	-0.105407	1.87793	0.753693	-2.01762	1.40557	0.799825	1.13722	-0.236744
2C1a	C	2	-2.03654	4.53695	2.51901	4.73184	4.54132	2.53199	2.31435	2.45007	1.47395	3.75629	4.92141	8.17942	2.44328	5.76181	1.62369	2.47209	2.0022	-2.03654	4.49827	-2.03654	4.04952	0.978565	6.44941	5.72918	1.31915	1.23871	2.68222	3.83444	6.75843	1.3159	2.85566	4.49118	1.95476	2.15461	1.88277	2.40965	5.83622	1.88612	0.650145	0.552852	1.78158	2.57577	0.612135	3.10948	1.72549	2.9121	1.73758
2C1b	C	2	-2.02103	4.58745	2.54743	4.75634	4.5187	1.83562	2.08	2.43044	1.71741	3.77266	4.94773	8.01747	2.46361	5.79338	1.53383	2.48762	2.08303	-2.02103	4.54021	-2.02103	4.0937	0.970091	6.51245	5.77081	1.321	1.3607	2.65236	3.86692	6.84275	1.18797	2.90694	4.58342	1.98814	2.02702	1.98153	2.48903	5.83364	1.81141	0.633881	0.588034	1.95511	2.67656	0.694257	3.19215	2.07902	3.01975	1.7387
2C1c	C	2	-2.00271	4.58332	2.54582	4.80956	4.48791	1.85005	2.23368	2.46909	2.08037	3.81785	4.91969	8.00092	2.46686	6.00872	1.76697	2.48946	2.1219	-2.00271	4.58452	-2.00271	4.09428	0.92684	6.52129	5.77445	1.36573	1.27961	2.21162	3.86206	6.83614	1.28338	2.96025	4.57704	2.02605	2.14062	1.89175	2.59446	5.62697	2.01197	0.680918	0.636478	1.89883	2.63602	0.745882	3.21327	2.13593	3.02976	1.76521
2C2a	C	2	-1.95428	4.29663	2.4682	4.63868	4.40488	2.45524	2.24232	2.36823	1.93923	4.02048	4.82621	8.03272	2.38782	5.93947	1.38743	2.42953	1.93345	-1.95428	4.5828	-1.95428	4.16082	0.569014	6.46514	5.79049	0.950987	0.828612	2.18639	3.51178	6.84935	1.5987	2.87134	4.61689	1.99083	2.21563	2.12074	2.55222	5.92976	1.90997	0.841532	0.258918	2.00271	2.67686	0.59615	3.14294	2.07887	2.98448	1.70522
2C2b	C	2	-1.89921	4.61387	2.57981	4.81262	4.43309	2.55992	2.34331	2.39279	1.72428	3.8806	4.89152	8.06967	2.45559	5.9912	1.52782	2.47195	1.93887	-1.89921	4.60863	-1.89921	4.18438	0.733142	6.5025	5.81826	1.11575	0.939085	2.27753	3.57752	6.75575	1.55431	2.91092	4.61898	2.04219	2.23414	2.08231	2.61182	5.76905	1.96416	0.916771	0.31904	1.90215	2.63124	0.836734	3.1998	2.09701	3.01813	1.81826
2C2c	C	2	-1.97251	4.57714	2.52273	4.73204	4.33229	2.49507	2.29515	2.32495	1.89187	3.90864	4.8746	8.00969	2.41178	5.94196	1.35782	2.42536	1.92162	-1.97251	4.40664	-1.97251	4.09558	0.577596	6.48061	5.7639	1.02106	0.890647	2.35298	3.52976	6.85255	1.50625	2.8523	4.58201	2.10016	2.22536	2.12	2.63353	5.87074	2.09808	0.757925	0.24725	1.9991	2.66524	0.796847	3.22289	2.10989	3.0595	1.76421
2C3a	C	2	-1.91014	4.56913	2.54234	4.82022	4.49407	2.57619	2.26742	2.32756	1.84836	3.87948	4.95333	7.9704	2.45328	5.9625	1.58878	2.52184	1.87953	-1.91014	4.59635	-1.91014	4.14966	0.586286	6.51228	5.7908	0.957693	0.859936	2.27244	3.52043	6.75898	1.63666	2.90926	4.61514	2.20322	2.26953	2.15035	2.67951	5.94821	2.03176	0.859058	0.26498	1.90798	2.78979	0.724752	3.30355	2.17495	3.22612	1.89517
2C3b	C	2	-1.97801	4.60859	2.50428	4.76748	4.02908	2.5499	2.23342	2.37426	1.7188	3.79074	4.87052	8.0203	-1.97801	5.81276	1.67379	2.47476	1.94646	-1.97801	4.55103	-1.97801	4.11998	0.52287	6.51038	5.76378	0.989583	0.811744	2.73383	3.46133	6.8459	1.64458	2.85352	4.6042	1.99626	2.20054	2.13716	2.60605	5.89442	2.01908	0.364476	0.156771	2.01286	2.81888	0.818472	3.31336	2.10285	3.18567	1.81342
2C3c	C	2	-1.96778	2.95346	2.53502	4.8126	4.44095	2.52176	2.24728	2.26785	1.69476	3.83875	4.86512	8.05349	2.38015	5.94855	1.71453	2.41986	1.97117	-1.96778	4.53476	-1.96778	4.11824	0.524533	6.4813	5.78244	0.952885	0.746949	2.70162	3.47707	6.86228	1.80922	2.88947	4.61729	2.01589	2.17164	2.11069	2.58573	5.88756	2.06492	0.376892	0.134512	2.05888	2.85986	0.928621	3.3558	2.11262	3.17245	1.7894
2X1a	X	2	2.49733	6.2558	2.90233	3.38491	5.0458	2.75111	2.70587	3.26509	2.07042	4.2983	4.60158	7.30252	3.0169	6.18286	-1.72384	4.04081	1.84988	1.32669	4.65511	2.49388	4.24968	2.39057	6.395	5.78519	2.13475	2.19223	2.88034	4.41952	6.89025	1.66139	3.59142	4.58721	1.87096	2.04647	2.30395	2.07856	6.16603	1.52702	0.879733	-1.72384	2.01704	1.76449	0.32603	2.26758	1.4999	1.72917	0.882161
2X1b	X	2	2.12906	5.58242	2.65434	3.07256	4.79175	2.55243	2.44815	2.97734	2.00688	4.13238	4.38671	8.16185	2.76058	5.95379	-1.93554	3.66676	1.62337	-1.93554	4.43483	2.28786	4.05043	2.06673	6.1676	5.60126	1.98225	1.93988	2.65914	4.16432	6.70343	1.21802	3.50456	4.41341	1.65236	1.81183	2.04369	1.8741	5.92896	1.28764	0.586421	-1.93554	1.91779	1.65241	-1.93554	2.0952	1.23644	1.5777	0.734311
2X1c	X	2	2.33383	5.83688	2.8998	3.2777	5.00364	2.4204	2.72618	3.29905	2.39839	4.14154	4.63161	7.28887	3.01957	6.20556	1.16495	4.04184	1.93378	1.28787	4.63835	2.58492	4.26161	2.41734	6.42168	5.84707	2.12534	2.17017	2.41417	4.38127	6.91508	1.63095	3.74872	4.66923	1.86519	1.98332	2.27381	2.13055	6.08859	1.56388	0.945291	-1.69604	2.21883	1.79072	0.517241	2.33336	1.47092	1.84207	0.859538
2X2a	X	2	2.46114	5.81164	2.89142	3.32861	5.03481	2.80278	2.64009	3.24642	2.26699	4.31728	4.52678	7.24684	2.92335	5.98662	1.10016	3.89672	2.02373	1.31972	4.69278	2.42017	4.2991	2.66766	6.53885	5.86217	2.23124	2.29711	2.62105	4.50347	6.95471	1.39047	3.68408	4.6855	1.79661	2.0451	2.20392	2.09087	6.22517	1.46432	0.573901	-1.66821	2.22764	1.77127	0.133515	2.2439	1.50642	1.68746	0.829437
2X2b	X	2	1.74452	5.87239	2.66353	2.95243	4.83678	2.53965	2.45622	2.93787	2.03961	4.09967	4.32778	8.22481	2.75101	5.93168	0.90137	3.69214	1.68416	1.14717	4.43272	2.20828	4.07849	2.47512	5.24142	5.70098	2.02099	2.0861	2.74999	4.28314	6.71263	1.34147	3.47053	4.44459	1.67667	1.76679	1.98549	1.81808	5.97407	1.22038	0.47671	-1.87392	1.95562	1.47629	-0.0227436	1.9443	1.17496	1.42878	0.568694
2X2c	X	2	2.20665	5.45973	2.75778	3.15528	4.85128	2.61845	2.47836	3.07228	2.01728	4.17122	4.33408	8.24679	2.77461	5.96743	0.942494	3.85352	1.81208	1.19159	4.49979	2.29714	4.14376	2.40115	5.30382	5.68257	2.19243	2.08675	2.37448	4.32255	6.78474	1.56117	3.42248	4.51437	1.64976	1.80943	2.08097	1.86069	5.79504	1.10591	0.501849	-1.8337	2.08412	1.69987	0.18347	2.08692	1.28285	1.49588	0.559304
2X3a	X	2	-1.99716	5.89482	2.55059	3.02002	4.6798	2.41434	2.4066	2.84428	1.92899	4.07621	4.20885	8.31816	2.62066	5.83136	0.60693	3.48399	1.61916	0.97142	4.36232	2.13274	3.98226	1.94692	6.20675	5.53229	1.80671	1.86095	2.25937	4.08412	6.62602	1.44273	3.37199	4.39824	1.32185	1.52264	1.96947	1.71216	5.72385	1.08165	0.187329	-1.99716	1.90245	1.50342	0.14373	1.93851	1.13714	1.35089	0.386745
2X3b	X	2	2.21983	5.92741	2.63803	3.11597	4.8263	2.54898	2.54781	2.97442	2.05624	4.13542	4.33234	8.28913	2.75889	5.94554	0.80639	3.81632	1.75992	1.05662	4.47668	2.25034	4.07828	2.13974	5.23713	5.6427	1.92709	1.97708	2.19756	4.23266	6.58836	1.49941	3.37825	4.49046	1.5097	1.17211	1.95455	1.67554	6.03921	0.844103	0.309853	-1.85732	2.02958	1.39888	-0.238563	1.8822	1.08758	1.30989	0.530558
2X3c	X	2	2.11625	5.79365	2.53252	2.99288	4.69179	2.42247	2.44962	2.83752	1.94799	4.00163	4.14742	8.32194	2.57635	5.73131	0.634321	3.66828	1.58403	-1.99986	4.3647	1.51923	4.01748	2.04537	6.19885	5.50614	1.81133	1.85665	2.27966	4.05799	6.59753	1.23546	3.26741	4.37837	1.4929	1.65125	1.85737	1.69122	5.91007	1.28063	0.223527	-0.0679035	1.82367	1.4454	-1.99986	1.86001	1.09828	1.30058	0.471362
3C1a	C	3	1.847	5.35616	2.42126	4.92833	4.15487	2.40691	2.24749	1.68357	1.546	3.64134	4.83774	8.27775	2.95483	6.08949	1.70044	4.01589	-2.08013	0.989574	4.30702	-2.08013	3.91006	0.196752	6.20504	5.48025	0.904449	0.790609	2.32497	3.4324	6.56683	1.04937	3.6531	4.35165	1.75692	1.9483	1.86755	2.20083	5.62331	1.61654	0.596451	0.0931156	2.07945	2.34374	0.740558	2.89307	1.645	2.63727	1.4128
3C1b	C	3	1.83291	5.38392	2.41032	4.94896	4.1586	2.47377	2.25177	1.69403	-2.05794	3.60017	4.88299	8.22586	2.99916	6.12611	1.55532	4.05536	1.38769	1.03121	4.32891	-2.05794	3.91173	0.261378	6.25527	5.54119	0.947711	0.822413	1.73737	3.47369	6.4743	1.09489	3.71435	4.32448	1.8596	2.0229	1.9397	2.36781	5.63888	1.50649	0.629355	0.0850935	1.90656	2.35334	0.716747	2.87317	1.91521	2.69783	1.55805
3C1c	C	3	1.86685	5.41575	2.47315	5.00623	4.15693	2.49057	2.2349	1.72301	1.79996	3.78446	4.8591	8.20786	3.03215	6.15666	1.90153	3.99431	1.45364	1.07033	4.39617	-2.03003	3.94582	0.299854	6.25974	5.57932	1.05274	0.863869	2.36457	3.49591	6.49618	1.13593	3.74059	4.39259	1.83069	1.80929	1.94314	2.23388	5.59083	1.65286	0.517156	0.262518	2.17844	2.33447	0.699596	2.89835	1.91249	2.66904	1.46731
3C2a	C	3	1.86641	5.43762	2.50194	4.90349	4.1442	2.52262	2.1587	1.66803	1.71236	3.67112	4.78668	8.23578	2.95279	6.08641	1.34946	4.04628	1.46168	1.00058	4.32076	-2.05485	3.9279	0.348411	6.2452	5.54701	1.02544	0.737682	1.85358	3.46542	6.58304	1.33592	3.68828	4.3531	1.84152	2.02318	1.92951	2.29309	5.45412	1.72242	0.621574	0.12873	2.09204	2.36661	0.734944	2.94602	1.72633	2.71382	1.52555
3C2b	C	3	1.84587	5.46885	2.46454	4.91206	4.16517	2.52538	2.14868	1.65901	1.68105	3.68632	4.78558	8.28728	2.92941	6.04691	1.41753	4.02102	1.49898	1.03987	4.29444	-2.0557	3.96689	-2.0557	6.23035	5.56402	0.973433	0.79593	2.24827	3.44952	6.50193	-2.0557	3.68537	4.39091	1.49221	1.97995	1.92235	2.26849	5.55909	1.6491	0.435027	0.097783	2.26468	2.46282	-2.0557	2.9656	1.87186	2.71112	1.30319
3C2c	C	3	1.90987	5.45042	2.45624	4.98167	4.20549	2.51044	2.14348	1.71414	1.69343	3.60174	4.79577	8.28316	2.99227	5.89324	1.36509	4.06467	-2.02584	1.06583	4.3509	-2.02584	3.96907	0.164145	6.22567	5.55533	0.991556	0.859031	1.81031	3.13705	6.4765	1.31711	3.69738	4.39308	1.81698	1.98995	1.91142	2.20939	5.65923	1.60184	0.381141	-0.00793434	2.12453	2.27435	0.761596	2.92062	1.89701	2.67283	1.46517
3C3a	C	3	1.88313	5.43137	2.42329	4.95868	4.14397	2.45795	2.15556	1.63211	1.65589	3.66032	4.75794	8.28186	2.90715	6.06407	1.26828	4.02917	1.48755	1.01904	4.31969	-2.03836	3.95687	-2.03836	6.263	5.56948	0.881182	0.656354	2.3143	3.40976	6.48096	1.24706	3.67234	4.39026	1.83816	1.93256	1.84227	2.24257	5.4923	1.54913	0.283696	0.0906747	2.07407	2.41361	0.733732	2.87552	1.84483	2.63209	1.37978
3C3b	C	3	1.97092	5.60492	2.59134	5.09025	4.24867	2.59627	2.27894	1.95945	1.86547	3.79455	4.86298	7.92439	3.06426	6.20725	1.4955	4.15375	1.47563	1.104	4.45854	-1.90925	4.0919	0.330853	6.35107	5.68737	1.05567	0.892422	1.95233	3.52632	6.68483	1.18087	3.79066	4.47334	1.951	2.25794	2.0919	2.45861	5.74449	1.85858	0.516509	0.0734917	2.07651	2.15419	0.874384	3.01205	2.04537	2.80974	1.62733
3C3c	C	3	1.85829	5.33612	2.44096	4.964	4.12458	2.49152	2.18425	1.65966	1.29642	3.65538	4.82351	8.22067	2.94292	6.0877	1.37628	3.567	1.45708	-2.02209	4.36792	-2.02209	3.97671	0.332055	6.2524	5.56404	0.934936	0.746646	1.74591	3.40509	6.59666	1.1072	3.68326	4.39786	1.82827	2.05505	1.94222	2.39275	5.65809	1.72338	0.356713	0.0937764	2.02033	2.36263	0.640764	2.89234	1.86427	2.69611	1.51744
3X1a	X	3	-2.06053	5.83375	1.63858	3.59764	4.49118	2.0984	2.22077	2.67863	1.85681	3.84878	4.62452	8.63402	3.26061	5.81214	1.00284	4.42093	-2.06053	1.24398	4.08832	2.00335	3.73142	2.06415	5.85409	5.20239	2.23946	2.16261	1.68103	4.23665	6.16937	0.921021	3.756	4.03313	1.28609	1.25878	1.73625	1.07225	5.47477	0.658997	0.0222572	-0.149067	1.94259	1.13003	-0.117427	1.72258	0.961737	1.23882	0.292292
3X1b	X	3	2.66363	5.94888	2.61192	3.73967	4.62061	2.29181	2.34295	2.89047	2.20136	4.01159	4.78048	8.20262	2.88774	6.07819	1.07393	4.54935	-1.90127	1.35006	4.23881	2.11981	3.90125	2.18535	5.99236	5.45035	2.26249	2.2856	2.37982	4.43077	6.46343	1.08431	3.91462	4.20892	1.44458	1.69366	1.89441	1.54766	5.64934	0.964385	0.297513	0.0291642	2.10351	1.38389	0.36188	1.92995	1.14578	1.44951	0.438012
3X1c	X	3	2.64425	6.06899	2.61173	3.70838	4.66204	2.37907	2.42326	2.87325	2.31378	4.14337	4.84008	8.08571	3.49834	6.01109	1.35018	4.64167	-1.84315	1.41355	4.33509	2.21053	3.8012	2.25021	6.06068	5.44882	2.34199	2.37348	2.04106	4.45533	6.52179	1.09643	3.98588	4.24955	1.36591	1.58575	1.96683	1.69826	5.7075	1.05719	0.439396	0.0416408	2.05514	1.333	0.107818	1.9279	1.2168	1.47077	0.526646
3X2a	X	3	2.57787	5.85635	2.53824	2.90667	4.55314	2.3068	2.21888	2.78299	2.10092	3.95072	4.73994	8.46243	3.32055	6.03178	-1.95444	4.49191	-1.95444	1.31943	3.03067	2.07863	3.80789	2.27574	5.87398	5.30652	2.19267	2.17859	2.09663	4.33553	6.37555	1.00136	3.80479	4.0948	1.35192	1.29468	1.75167	1.43338	5.56699	0.809125	0.287937	-0.158718	2.02313	1.31343	-0.0608508	1.77765	1.04176	1.38644	0.253644
3X2b	X	3	2.52345	5.9634	2.53372	3.66342	4.57944	2.29043	2.30459	2.8738	2.08304	3.9077	4.67941	8.49428	3.3147	6.01957	-1.9832	4.47539	-1.9832	1.31149	4.11992	2.08006	3.80061	2.35454	4.98336	5.30839	2.26234	2.25354	2.01085	4.31119	6.38734	1.34763	3.8299	4.14232	1.30451	1.45501	1.68903	1.42722	5.5308	0.779798	-0.0358378	-0.0713917	2.17425	1.39819	0.240054	1.87482	0.994765	1.35715	0.354374
3X2c	X	3	2.849	6.26094	2.8597	3.96851	4.86261	2.60779	2.10994	3.18894	2.35766	4.29589	4.99911	7.46213	3.59307	6.32247	-1.66703	4.77815	-1.66703	1.56878	4.37818	2.36001	4.10697	2.64512	6.22311	5.61527	2.56963	2.56865	2.43449	4.61728	6.70813	1.31313	4.11989	4.449	1.47872	1.91775	2.1355	1.80251	5.64637	1.26961	0.37234	-1.66703	2.32341	1.68494	0.503533	2.18435	1.31216	1.79255	0.625543
3X3a	X	3	-1.912	5.90754	2.52472	3.61573	4.61698	2.30515	2.24827	2.79374	2.09281	4.05263	4.69836	8.50901	3.35883	5.88094	0.942639	4.53384	1.00136	1.39447	4.21424	2.10734	3.85553	2.19657	5.05661	5.44644	2.16187	2.23834	1.91273	4.36684	6.29576	1.2199	3.84083	4.16695	1.35034	1.6218	1.7419	1.55065	5.53651	0.946095	0.125322	0.0587245	2.07174	1.3421	0.119023	1.87134	1.02432	1.38933	0.390511
3X3b	X	3	2.77969	6.16436	2.7145	3.86456	4.7776	2.45801	2.4281	2.96836	2.30111	4.11315	4.87371	8.09463	3.48888	6.02231	1.2	4.65859	-1.7671	1.55089	4.35992	2.25142	4.00323	2.44634	5.18981	5.50397	2.47801	2.38687	2.05915	4.51898	6.56809	1.23377	4.00128	4.30906	1.39751	1.76157	1.95575	1.63168	5.7756	1.03037	0.461291	-1.7671	2.22591	1.40216	0.141005	1.99962	1.21514	1.52893	0.516408
3X3c	X	3	2.76838	6.14294	2.76506	3.8781	4.77784	2.48148	2.41852	2.97322	2.28113	4.12695	4.86768	7.93157	3.51424	6.18944	1.14869	4.68198	-1.76878	1.51487	2.88611	2.25109	4.02127	2.46303	6.16868	5.53174	2.37302	2.37229	2.11613	4.3676	6.45876	1.19634	4.0128	4.28316	1.66334	1.6225	2.05946	1.65527	5.77124	1.14296	0.510218	0.264042	2.15963	1.31159	0.402917	2.03688	1.1316	1.52695	0.476572
4C1a	C	4	-1.81914	4.34218	2.32889	4.75389	-1.81914	2.15787	2.22173	-1.81914	1.15357	3.74313	3.2624	7.99337	2.14488	5.31072	1.63431	2.53572	2.86323	-1.81914	4.6666	-1.81914	4.30198	-1.81914	6.65103	5.98649	1.3939	1.05473	2.30638	3.82847	6.9843	1.78764	2.02459	4.79702	2.35316	2.55421	2.22042	3.06373	6.12809	2.50891	0.549048	0.399192	2.12364	3.23558	0.638514	3.62275	2.26496	3.43301	1.95413
4C1b	C	4	-1.77694	4.39035	2.3767	4.79219	-1.77694	2.21394	2.24533	-1.77694	1.28127	3.77506	3.06972	7.97629	2.19206	5.34027	1.57786	2.56739	2.72664	-1.77694	4.67529	-1.77694	4.334	0.790664	6.65228	5.99553	1.46375	1.19642	2.34767	3.9036	6.9764	1.64547	2.03218	4.76833	2.3459	2.54101	2.19679	3.02201	6.19221	2.54735	0.707987	0.344398	2.03013	3.18373	0.642418	3.50235	2.22452	3.39373	1.98786
4C1c	C	4	-1.80613	4.3759	2.39543	4.78158	1.47031	2.2143	2.27172	-1.80613	1.37801	3.7306	3.04354	8.0353	2.12774	5.3122	1.97895	2.5227	2.88182	-1.80613	4.6253	-1.80613	4.36045	0.745993	6.66696	5.96279	1.39297	1.12349	2.36987	3.82576	6.98443	1.87176	1.99895	4.78704	2.28043	2.4467	1.86543	2.9583	6.11065	2.35202	0.618077	0.260057	2.08586	3.20536	0.762871	3.57984	2.12243	3.33366	1.86259
4C2a	C	4	-1.78999	4.30242	2.45442	4.87846	-1.78999	2.23888	2.36038	-1.78999	1.47573	3.75525	3.30229	8.02143	2.1736	5.33521	1.85202	2.57193	2.72989	-1.78999	4.66443	-1.78999	4.30826	0.821725	6.64009	5.97802	1.43506	1.19029	2.29088	3.8594	6.96423	1.72873	2.02678	4.75374	2.33552	2.44785	2.17477	2.93007	6.13728	2.39024	0.554269	0.389694	1.87044	3.07076	0.634249	3.41446	2.1091	3.19391	1.88082
4C2b	C	4	-1.81467	4.39819	2.44925	4.8547	1.41134	2.18248	2.38369	-1.81467	1.473	3.77105	3.09012	7.9668	2.16458	5.35549	1.92739	2.53444	2.66669	-1.81467	4.72039	-1.81467	4.31277	0.868564	6.66483	5.96094	1.42668	1.14026	2.44526	3.8286	6.97435	1.72343	2.08529	4.73983	2.32187	2.39462	2.17668	3.02612	6.10363	2.46763	0.704026	0.455633	1.85381	3.06098	0.663115	3.47566	2.1906	3.27387	1.91023
4C2c	C	4	-1.71344	4.38216	2.51879	5.02307	-1.71344	2.30893	2.50287	-1.71344	1.67916	-1.71344	3.2001	8.04898	2.33534	5.38636	1.9555	2.70666	2.80884	-1.71344	3.59667	-1.71344	4.38166	0.990887	6.72996	6.00752	1.49834	1.21111	3.01994	3.91684	7.05335	1.55041	2.1225	4.74875	2.34236	2.514	2.16385	3.0978	6.12533	2.45424	1.05089	0.601325	1.9888	3.11793	0.743979	3.49522	2.23234	3.30446	2.04841
4C3a	C	4	-1.70512	4.24474	2.34656	4.83208	-1.70512	-1.70512	2.36387	-1.70512	-1.70512	3.77245	3.05837	8.08429	2.17465	5.26065	1.56485	2.48696	2.64215	-1.70512	4.68425	-1.70512	4.36954	-1.70512	6.72842	6.01381	1.37977	1.08716	3.10917	3.79124	6.92308	1.88987	2.04664	4.71621	2.48264	2.56903	2.26503	3.17834	6.24498	2.62419	0.81837	0.288953	-1.70512	3.26239	0.347167	3.66221	2.03737	3.47735	2.065
4C3b	C	4	-1.75917	4.17197	2.35383	4.71148	-1.75917	2.06211	2.20817	-1.75917	-1.75917	4.12374	3.20051	8.1376	2.13094	5.24281	1.39816	2.0359	2.64881	-1.75917	4.62201	-1.75917	4.28413	0.541785	6.61275	5.95769	-1.75917	0.892088	2.43978	3.71138	6.86991	1.84301	2.00009	4.70936	2.36836	2.52054	2.26701	3.10739	6.15754	2.50135	0.891149	0.167544	2.03266	3.25082	0.676964	3.64581	2.19405	3.40996	1.8598
4C3c	C	4	-1.71012	4.01162	2.37162	4.76776	-1.71012	2.128	2.30012	-1.71012	-1.71012	3.87551	3.25282	8.0228	-1.71012	5.31054	1.50471	2.53506	2.7506	-1.71012	4.70914	-1.71012	4.42392	-1.71012	6.68602	6.08491	1.28166	0.982644	2.60405	3.75271	6.93468	1.9822	2.07471	4.81358	2.46644	2.63091	2.30635	3.13851	6.12062	2.58645	0.951078	-1.71012	2.17634	3.31223	0.770777	3.67229	2.25499	3.48002	2.01815
4X1a	X	4	1.67843	4.53621	2.46453	4.15517	3.39406	1.64044	2.522	2.53058	1.97158	4.31073	3.06503	7.22318	2.76303	5.97084	-1.61407	3.77403	1.97659	1.40827	4.85111	2.66105	4.55121	2.39804	6.71738	6.04546	2.64237	2.54441	2.64556	4.73939	7.15087	1.8004	3.49555	4.91641	1.96782	2.1797	2.37159	2.30804	6.37922	1.73198	0.981247	-1.61407	2.24813	2.07616	0.735325	2.64245	1.91321	2.28067	1.28227
4X1b	X	4	1.42453	4.45833	2.25854	3.85745	3.06585	-1.86864	2.33305	2.03554	-1.86864	4.02702	2.74821	8.19391	2.55601	5.66187	0.818885	3.41982	1.75985	1.17325	4.79447	2.53292	4.2972	2.12077	6.42009	5.77085	2.38975	2.39281	2.42224	4.47574	6.92551	1.36735	3.23323	4.63914	1.63515	1.88187	2.12966	2.04031	6.10976	1.33657	0.317034	0.271345	2.06851	1.84198	0.56547	2.39073	1.51343	2.04599	1.0896
4X1c	X	4	1.67469	4.58588	2.53665	4.16662	3.44881	2.3943	2.57557	2.56034	2.14766	4.31672	3.04073	7.29819	2.79787	5.92707	1.23772	3.83331	2.00119	1.43233	5.10234	2.57687	4.5853	2.47505	6.76247	6.06431	2.57243	2.66865	3.15172	4.74499	7.17102	1.8044	3.56236	4.92606	1.86716	2.12422	2.41686	2.36828	6.21756	1.82616	0.79212	0.518464	2.1917	2.07852	-1.57737	2.70546	1.8449	2.35221	1.34484
4X2a	X	4	-1.74014	4.46121	2.35764	3.97717	3.26914	2.15267	2.50368	2.35805	2.02194	4.3922	2.91492	7.94367	2.72974	5.88123	1.5865	3.75296	1.86331	1.28402	4.9768	3.06365	4.44406	-1.74014	6.59259	5.97119	1.39015	1.25222	2.94882	3.78274	6.90585	1.47768	3.42472	4.7943	1.80453	1.9804	2.16789	2.11231	5.9585	1.48086	0.517193	0.918933	2.12321	1.90317	0.579345	2.50431	1.62297	2.13202	1.09081
4X2b	X	4	-1.58633	4.57606	2.5071	4.13143	3.43815	2.31953	2.6452	2.31315	2.13474	4.40071	2.91904	7.25211	2.8552	6.00061	1.8492	3.9008	2.05874	1.47891	5.06319	3.15968	4.59654	0.513604	6.74586	6.09149	1.55056	1.37884	2.64133	3.93285	7.18318	1.88661	3.60948	4.96534	1.95993	2.16891	2.37208	2.22901	6.30984	1.70584	0.760466	1.14395	2.29511	2.19101	0.757994	2.69177	1.79391	2.28649	1.27174
4X2c	X	4	1.44547	4.27915	2.22593	3.89525	2.46442	-1.8578	2.37721	2.1649	1.90224	4.01933	2.79831	8.46778	2.54638	5.739	1.66494	3.60464	1.86996	0.711187	3.4716	2.9172	4.28685	0.28655	6.43862	5.79709	1.21813	1.14422	2.29703	3.21329	6.79986	1.61641	3.27306	4.69767	1.38057	1.70691	2.05562	1.67107	5.69862	1.22304	0.0931853	0.774216	2.18182	1.85185	0.292993	2.38609	1.44517	1.90902	0.888596
4X3a	X	4	1.48771	4.49422	2.25363	3.96073	3.1825	2.10576	2.3354	2.17321	2.02998	4.18998	2.89798	8.26755	2.65903	5.7037	1.90605	3.00954	-1.86217	1.1175	4.82173	3.02175	4.32119	-1.86217	6.45914	5.8262	1.29369	1.16219	2.33391	3.09854	6.83	1.573	3.37857	4.70877	1.70261	1.84942	2.107	2.00008	6.09278	1.35928	0.451384	0.654405	2.09629	1.99868	0.535274	2.51608	1.65246	2.12338	1.03123
4X3b	X	4	-1.86495	4.30584	2.25583	3.95427	3.18328	2.13886	2.32589	2.12819	1.95831	4.15897	2.65362	8.22785	2.66385	5.82515	1.75885	3.66172	1.81726	1.19838	4.82246	3.02339	4.28515	-1.86495	6.457	5.81468	1.26401	1.12826	2.31672	3.5967	6.92282	1.327	3.38724	4.64689	1.70153	1.84948	2.14529	2.03365	5.87611	1.38595	0.336821	0.707612	2.02541	1.81252	0.381004	2.38747	1.58174	2.09955	0.985217
4X3c	X	4	1.73094	4.53079	2.48957	4.20703	3.42712	2.33364	2.51215	2.52986	2.20759	4.30842	3.13716	7.25971	2.90737	5.94346	1.97579	3.91742	2.02882	1.41025	5.05865	3.24806	4.53615	0.441869	6.75596	6.04172	1.49295	1.31029	2.99189	3.86347	7.16028	1.50763	3.65415	4.86592	1.9912	2.08222	2.27854	2.28788	6.32906	1.62821	0.64451	0.983345	2.17518	2.04503	0.410351	2.70772	1.8156	2.36186	1.28758
5C1a	C	5	-1.71164	4.58	2.3805	4.64269	-1.71164	2.20921	2.39185	-1.71164	-1.71164	3.77604	4.51304	7.31245	2.61392	5.39754	1.28218	3.17748	1.88412	1.11301	4.86212	-1.71164	4.41782	0.628991	6.881	6.16098	1.38247	1.10314	3.18602	3.77422	7.10211	1.89804	2.07088	4.9619	2.47044	2.63765	2.24238	3.23437	6.31602	2.62854	1.00065	-1.71164	1.68271	3.31143	0.685346	3.7564	2.41982	3.64347	2.2672
5C1b	C	5	-1.64541	4.6586	2.43914	4.72289	-1.64541	-1.64541	2.46261	-1.64541	-1.64541	3.82895	4.64567	6.82789	2.74553	5.46315	1.41877	3.35832	1.81992	1.17649	4.85675	-1.64541	4.44904	0.747425	6.95174	6.17521	1.50826	1.18605	2.72203	3.89564	7.27252	1.77818	2.9526	4.96362	2.51144	2.56376	2.29474	3.32194	6.37222	2.67909	1.25425	0.425177	1.6979	3.38305	0.750612	3.80487	2.47592	3.71075	2.37956
5C1c	C	5	-1.80337	4.46093	2.39842	4.59467	-1.80337	2.14829	2.31291	-1.80337	1.43712	3.65883	3.9757	7.82064	2.57745	5.29876	1.36557	3.14698	1.58229	1.02964	4.73894	-1.80337	4.25983	0.698311	6.75403	6.01764	1.31622	1.07252	2.54057	3.72626	7.09921	1.57621	1.93208	4.759	2.38135	2.43808	2.16128	3.12537	6.0164	2.48756	1.03381	0.370689	1.4461	3.16589	0.625722	3.61527	2.26578	3.48576	2.19205
5C2a	C	5	-1.71286	4.1795	2.37588	4.52976	-1.71286	2.18142	2.37655	-1.71286	1.35544	3.72143	4.48618	7.41315	2.62224	5.31596	-1.71286	3.18014	1.67019	1.10067	4.79891	-1.71286	4.36183	0.779869	6.8588	6.06102	1.46942	1.21292	3.27555	3.82735	7.21003	1.97654	2.18572	4.90019	2.47175	2.64161	2.2879	3.25445	6.21212	2.64477	1.12271	0.528591	-1.71286	3.33364	0.810957	3.78321	2.36252	3.62385	2.26572
5C2b	C	5	-1.82912	4.35707	-1.82912	4.422	-1.82912	1.94432	2.26617	-1.82912	-1.82912	3.62572	4.20512	7.82898	2.48627	5.2185	0.982274	3.04646	1.58036	1.0054	4.72816	-1.82912	4.28393	0.729057	6.76233	6.02933	1.38402	1.08643	3.1143	3.72162	7.11383	1.82972	2.73547	4.8217	2.30891	2.51216	2.19261	3.14226	6.15402	2.49704	0.704629	0.303696	1.59254	3.27476	0.65078	3.67675	2.26915	3.52571	2.12081
5C2c	C	5	-1.78582	4.3322	2.28337	4.22761	-1.78582	2.07546	2.33307	-1.78582	-1.78582	3.60687	4.43616	7.90744	2.55836	5.21077	1.05095	3.13699	1.65764	-1.78582	4.67956	-1.78582	4.30257	-1.78582	6.77057	6.04299	1.41125	1.16284	2.58426	3.76553	7.03727	1.98875	2.02354	4.8441	2.33262	2.56228	2.27204	3.08719	6.22427	2.53702	0.551713	0.305543	1.84908	3.2568	0.714288	3.72164	2.15425	3.5343	2.16338
5C3a	C	5	-1.80113	4.40402	-1.80113	4.47733	1.07413	-1.80113	2.19012	-1.80113	-1.80113	3.64926	4.31888	7.89346	2.48535	5.17361	1.57749	3.13344	1.79189	1.02709	4.67979	-1.80113	4.30181	0.543568	6.72044	6.01361	1.21878	0.991454	2.54676	3.62867	7.01533	1.87727	2.69899	4.85327	2.3377	2.42655	1.96029	3.10008	6.12947	2.56863	0.832925	0.161542	1.95896	3.28077	0.805631	3.71037	2.32089	3.50737	2.01545
5C3b	C	5	-1.82085	4.2911	2.17932	4.41493	-1.82085	2.02509	2.17931	-1.82085	-1.82085	3.63177	4.29716	7.85227	2.44618	5.15971	1.56021	3.10493	1.75429	0.94604	4.62481	-1.82085	4.29718	-1.82085	6.73234	6.01687	1.22341	0.966021	2.54064	3.59678	7.08438	1.89074	2.67357	4.80458	2.35969	2.58993	2.24193	3.15976	6.18085	2.58294	0.901255	-1.82085	1.6873	3.25678	0.639659	3.68236	2.29015	3.52309	2.09651
5C3c	C	5	-1.80575	4.28273	2.2482	4.43487	-1.80575	2.04053	2.1394	-1.80575	-1.80575	3.64533	4.31323	7.82473	2.47828	5.16528	1.56566	3.09862	1.67217	0.955141	4.64553	-1.80575	4.30874	0.591686	6.70495	6.022	0.887102	1.02489	3.13497	3.63746	7.0696	1.8631	2.60676	4.79913	2.38794	2.41705	2.22148	3.14985	6.2056	2.51542	0.872591	0.199776	1.8579	3.24312	0.697547	3.63054	2.26787	3.50716	2.12761
5X1a	X	5	1.79676	5.5232	2.57703	3.20405	3.11699	2.10825	2.72741	2.15686	1.78471	4.28216	4.08223	7.68834	2.87647	5.74804	1.71187	3.72506	-1.68877	1.28112	4.96498	2.57129	4.49179	-1.68877	6.64422	5.96119	1.33852	1.3373	2.68481	3.68526	6.97521	1.80987	3.4462	4.81946	1.89069	2.08548	2.28294	2.13781	6.27109	1.55253	0.580574	0.687592	1.75438	2.02646	-1.68877	2.53973	1.6872	2.16379	1.18179
5X1b	X	5	1.70852	5.34837	2.5272	3.13971	2.96107	2.04649	2.67224	1.96198	1.84484	4.09388	3.97942	8.08974	2.81471	5.63305	1.52872	3.6478	-1.81352	0.928753	4.8477	2.48631	4.34434	-1.81352	6.49522	5.79985	1.30721	1.17578	2.48581	3.56196	6.83809	1.48273	3.29972	4.61896	1.86667	1.88112	2.10348	2.03016	6.12238	1.48476	0.551515	0.659132	1.77538	1.76734	0.199066	2.43226	1.45057	2.04163	1.05416
5X1c	X	5	1.86656	5.53656	2.74389	3.32602	3.28803	2.28929	2.8307	2.44666	1.81542	4.33138	3.78746	7.28696	3.00299	5.84882	1.91987	3.69619	1.64427	-1.59165	5.06912	2.65047	4.54431	0.582271	6.59373	6.08035	1.49245	1.31293	2.7798	3.76107	7.1203	1.95662	3.52611	4.88591	2.07278	2.18947	2.39014	2.39223	6.36212	1.60639	0.813575	0.937984	2.19263	2.25232	0.531947	2.69949	1.92181	2.29662	1.14689
5X2a	X	5	1.54925	5.30745	2.29424	2.65127	2.97768	1.97623	2.35232	2.00905	1.70161	4.06896	3.89716	8.22407	2.67966	5.5148	1.47976	3.58103	-1.83222	1.21412	4.82334	2.43556	4.31381	-1.83222	6.45027	5.73685	1.27785	1.20034	2.40091	3.62002	6.92025	1.67132	3.28063	4.56335	1.31424	1.8067	2.16304	1.81336	6.10299	1.05652	0.285786	0.594819	2.0112	1.94114	0.370636	2.34425	1.21738	1.87923	0.826464
5X2b	X	5	1.49698	5.18912	2.34819	3.04324	3.02245	1.40804	2.13526	2.07998	1.69692	4.07624	3.87258	8.19989	2.6703	5.55051	1.49193	3.51352	1.39811	1.12267	4.74163	2.39255	4.31583	-1.83489	6.46256	5.78051	1.27237	1.14206	2.85502	3.59621	6.93188	1.75858	3.21206	4.60854	1.73521	1.33446	2.09367	1.91881	6.01376	1.378	0.162432	0.679385	2.01098	1.90185	0.582587	2.37658	1.41985	1.92762	0.900779
5X2c	X	5	1.21311	5.36374	2.44	3.14653	2.53248	2.158	2.53499	2.28126	1.94812	4.08159	3.98966	7.78273	2.85014	5.57454	1.67112	3.74027	1.42168	1.33068	4.98347	2.58155	4.48954	-1.67796	6.57382	5.93456	1.43037	1.29948	2.63814	3.7324	7.06426	1.908	3.38237	4.75404	1.88687	2.03246	2.12193	2.05252	6.27078	1.48777	0.873689	0.747529	2.0742	1.97796	0.647328	2.51476	1.55884	2.0574	1.05183
5X3a	X	5	1.71445	5.48947	2.46943	3.14431	3.1839	2.08012	2.5082	2.00812	1.91554	4.28586	4.02391	7.77528	2.91726	5.73357	2.24637	3.65801	-1.67529	1.36374	4.91406	2.56213	4.49889	0.807776	6.55428	5.90345	1.50321	1.35041	2.97396	3.75303	7.06943	1.85843	3.38429	4.75609	1.84502	1.98222	2.25558	2.01792	6.08456	1.40827	0.506453	0.741028	2.06153	1.92451	0.366924	2.50196	1.5976	2.02972	0.982596
5X3b	X	5	1.78781	5.49615	-1.65663	3.14891	3.21256	2.15577	2.50664	2.25057	1.81333	4.10223	4.03613	7.76232	2.94886	5.43946	2.29685	3.763	-1.65663	1.32121	5.00639	2.59631	4.48215	-1.65663	6.59893	5.93485	1.44972	1.36076	2.78157	3.78164	7.08181	1.87476	3.34888	4.76703	1.46786	2.07612	2.31129	2.16815	6.28506	1.50084	0.651253	0.797449	1.95589	1.87381	0.633275	2.55848	1.67175	2.11243	1.03214
5X3c	X	5	0.985457	5.32152	2.27791	2.99184	3.01845	1.98823	2.30301	2.07098	1.81277	4.19256	3.8539	8.18258	2.768	5.59029	2.06021	3.55146	-1.82451	1.21182	4.59964	1.79432	4.33653	0.616065	6.42312	5.7672	1.3726	1.23952	2.83069	3.62548	6.91858	1.60531	3.23912	4.61359	1.68351	1.86609	2.14013	1.87233	6.11191	1.34289	0.336738	0.656529	1.7983	1.79434	0.519641	2.35583	1.43203	1.98168	0.924029
6C1a	C	6	1.43566	5.06642	2.39029	5.00898	2.71549	2.6068	2.4253	-1.77956	-1.77956	3.72413	2.59361	7.93357	2.54597	4.62556	2.31491	3.47191	2.70617	1.22965	4.81788	-1.77956	4.36875	0.768784	6.65026	5.9263	1.41993	1.27492	2.50779	3.8181	6.88753	1.88409	2.26647	4.71668	2.29193	2.46395	2.22801	3.00666	6.15046	2.39803	0.744577	0.275247	1.87698	3.08524	0.374212	3.46741	2.11523	3.22206	1.89359
6C1b	C	6	1.63739	5.21113	2.59421	5.1102	2.69354	2.21906	2.53409	-1.65183	1.76143	3.86872	2.75094	7.30314	2.63714	4.81349	2.44496	3.54333	2.80844	1.22174	4.99496	-1.65183	4.50453	0.935935	6.81878	6.06367	1.59042	1.28122	3.20628	3.93441	7.00647	1.91293	2.37501	4.84944	2.53493	2.54337	2.34789	3.16164	6.31396	2.50133	0.857913	0.555261	1.97366	3.2407	0.667196	3.61294	2.2749	3.39204	2.04818
6C1c	C	6	-1.78734	5.12292	2.42355	5.0042	2.64104	2.66721	2.35325	-1.78734	1.65198	3.72224	2.53964	7.86655	2.52703	4.57482	2.55523	3.41477	2.78042	1.21159	4.83464	-1.78734	4.34966	0.757699	6.6508	5.9403	1.3808	1.1418	2.55343	3.79793	6.99959	1.86123	2.26249	4.73461	2.28758	2.43629	2.17495	3.00842	6.17877	2.3855	0.624295	0.387226	1.87397	3.05187	0.659925	3.39571	2.10576	3.20902	1.83329
6C2a	C	6	-1.73564	5.10578	2.46687	5.03668	2.54721	2.61565	2.37941	-1.73564	1.54405	3.78874	2.58503	7.87236	2.53603	4.68246	1.98192	3.46403	2.84339	1.21164	4.86259	-1.73564	4.41202	0.73738	6.67392	5.9397	1.4512	1.16139	2.5823	3.78651	6.86581	1.70715	2.70801	4.69487	2.41916	2.52668	2.27752	3.10504	6.16501	2.36159	0.857387	0.423874	1.86179	3.16379	0.308338	3.53328	2.16917	3.37844	2.00693
6C2b	C	6	-1.71976	5.13763	2.48715	5.0377	2.58036	2.65716	2.42711	-1.71976	1.51475	3.78021	2.69486	7.86557	2.51989	4.62265	1.89333	3.42315	2.83911	1.20153	4.87339	-1.71976	4.41013	0.656472	6.70818	5.97356	1.38967	1.17392	3.1296	3.81646	6.99935	1.85773	2.1287	4.70519	2.46389	2.59026	2.27068	3.15148	6.22303	2.57009	1.06722	0.451466	1.85089	3.18242	0.616039	3.55758	2.18101	3.38654	1.9797
6C2c	C	6	-1.71768	4.99925	2.42746	5.04384	2.599	2.62967	2.41679	-1.71768	-1.71768	3.74407	2.71892	7.95014	2.52381	4.56721	1.94927	3.45396	2.9494	1.24238	4.85404	-1.71768	4.41458	0.771537	6.47761	5.97193	1.4772	1.24123	2.48685	3.79989	6.99022	1.90253	2.22455	4.71236	2.37305	2.47476	2.23476	3.05557	6.22674	2.46584	0.573065	0.398075	1.95544	3.13986	-1.71768	3.51772	2.02652	3.28898	1.92036
6C3a	C	6	1.63605	4.98038	2.58156	5.18159	2.70356	2.77368	2.32193	-1.73862	1.60614	3.7646	2.60091	7.87776	2.57321	4.67776	1.5713	3.50733	3.06533	1.27993	4.82349	-1.73862	4.38887	0.811945	6.69542	5.94335	1.54385	1.20715	2.49061	3.87568	6.84187	1.79642	2.32391	4.68335	2.43425	2.65338	2.17578	3.11173	6.1094	2.5055	1.03604	0.5511	1.56184	3.1524	-1.73862	3.54058	2.13697	3.36416	1.95837
6C3b	C	6	1.65798	5.25517	2.51216	5.1571	2.6859	2.75363	2.38979	-1.7695	-1.7695	3.73674	2.7402	7.90561	2.54508	4.63514	1.51955	3.49684	3.07313	1.24707	4.79818	-1.7695	4.35404	0.770181	6.603	5.88832	1.50218	1.23736	2.44425	3.81899	6.93441	1.85809	2.09237	4.66739	2.28752	2.489	2.1597	2.96265	6.17292	2.39384	0.990076	-1.7695	1.91848	3.15543	0.22445	3.48953	2.10227	3.30827	1.95932
6C3c	C	6	1.59907	5.24408	2.56913	5.17609	2.64968	2.73468	2.38419	-1.76796	1.5559	3.69014	2.63078	7.88621	2.5371	4.65963	1.58452	3.42485	3.10409	1.17165	4.79958	-1.76796	4.34031	0.826865	6.59309	5.88698	1.45991	1.22659	2.41598	3.82525	6.91629	1.77082	2.16267	4.64673	2.313	2.4853	2.08886	3.06368	6.17618	2.48128	0.979686	0.475093	1.81042	3.05669	0.38164	3.46873	2.17594	3.28203	1.94648
6X1a	X	6	1.49694	5.47609	2.21273	3.50897	3.4835	2.23406	2.53784	2.1473	1.57103	3.94336	3.02803	8.04173	2.91197	4.94935	2.64948	4.23671	2.05856	1.57507	4.87208	2.63682	4.33046	0.362608	6.32789	5.81853	1.23754	1.19232	2.58886	3.4447	6.96851	1.70178	3.12445	4.66056	2.10399	2.19044	2.22892	2.53036	6.21963	1.84954	0.801655	0.473821	1.97216	2.29117	0.10043	2.57465	1.44822	2.10025	1.09343
6X1b	X	6	1.63649	4.96461	2.25464	3.43311	3.45667	2.24948	2.50235	2.22652	1.71512	3.99676	2.8335	8.06117	2.93642	4.95944	2.51098	4.28862	2.15417	1.57727	4.86531	2.60978	4.33839	0.372696	6.53065	5.86211	1.19776	1.20404	2.613	3.44443	6.99071	1.81831	3.18996	4.69096	1.25112	2.13422	2.22162	2.42352	6.2429	1.83483	0.414487	0.596966	2.10758	2.27477	-1.76354	2.57069	1.42528	2.07511	1.02353
6X1c	X	6	1.52844	5.4141	2.2395	3.46019	3.46271	2.2124	2.44213	2.10982	1.70165	3.95931	2.95794	8.01407	2.90902	4.92686	2.72225	4.19622	2.08476	1.58837	4.8756	2.59279	4.34242	-1.79041	6.53425	5.81828	1.16154	1.04258	3.00635	3.40239	6.92683	1.70613	3.18216	4.66171	2.01631	2.13357	2.18107	2.45864	6.23026	1.81574	0.757262	0.439059	1.89873	2.24738	-0.0214276	2.54719	1.48918	2.09405	1.02767
6X2a	X	6	1.58658	5.47149	2.26055	3.38551	3.59502	2.30164	2.51008	2.1744	1.54486	3.94059	2.80181	7.98236	2.88857	4.92842	2.39128	4.26211	2.02677	1.59599	4.89939	2.59384	4.3902	-1.74491	6.57444	5.88688	1.23558	1.13477	2.65733	3.47789	6.85836	1.81695	3.17498	4.70736	1.94136	2.1204	2.21443	2.50574	6.29407	1.85551	0.950273	0.421629	1.73465	2.1712	-0.139329	2.51739	1.50968	2.08675	1.11496
6X2b	X	6	-1.75221	5.42497	1.89713	3.34723	3.57362	2.3234	2.41262	2.12238	1.54215	4.12078	2.94173	8.01438	2.85121	4.92585	2.34996	4.23219	2.16341	1.22515	4.81632	2.58375	4.35091	-1.75221	6.532	5.87969	1.21184	1.09016	2.63609	3.44704	6.95938	1.73566	3.18176	4.72238	1.8941	2.11713	2.20424	2.48796	6.2597	1.86647	0.478597	0.476917	1.9689	2.10805	0.179056	2.58139	1.53477	2.04323	0.992164
6X2c	X	6	1.68042	4.99403	-1.71392	3.45383	3.61068	2.33484	2.47468	-1.71392	1.58213	4.0282	2.83372	8.04395	2.88532	4.93324	2.37241	4.26484	2.1316	1.57671	4.81628	2.63589	4.41404	0.445438	6.55868	5.90717	1.23655	1.11781	2.61181	3.47522	7.00266	1.88234	3.18636	4.76991	2.03298	2.14317	2.28659	2.52773	6.22753	1.80378	0.328376	0.385668	2.1003	2.37967	-0.023027	2.61049	1.51642	2.10073	1.06037
6X3a	X	6	1.679	4.97555	2.20632	3.50884	3.55602	2.26368	2.36848	2.13643	1.52528	4.1604	2.87071	8.01396	2.82895	4.84264	2.66059	4.17606	2.16458	1.57388	4.91545	2.51476	4.38817	-1.73172	6.52852	5.89387	1.25547	1.07587	2.98035	3.45223	6.97177	1.76027	3.13498	4.73129	1.9089	2.07709	2.20664	2.43332	6.2847	1.77543	0.337006	0.454212	2.02483	2.15396	-1.73172	2.50278	1.44907	2.00902	0.856341
6X3b	X	6	1.6375	5.42557	2.17016	3.45664	3.53088	2.24345	2.45762	2.23487	1.48247	3.995	2.91042	8.02867	2.8232	4.92363	2.68497	4.20585	2.12166	1.52806	4.9095	2.52971	4.37977	-1.73279	6.5645	5.89032	1.19772	1.1569	2.5772	3.4481	6.86761	1.59626	3.16249	4.73031	1.95446	2.09347	2.22297	2.31381	6.27316	1.67952	0.691711	0.470805	1.9959	2.19986	-0.171824	2.46507	1.45932	2.00282	0.973142
6X3c	X	6	1.61445	5.15504	-1.72604	3.51314	3.57037	-1.72604	2.41785	2.20705	1.62229	4.14499	2.80558	8.09627	2.83612	4.81005	2.66137	4.23497	2.24104	1.56797	4.88761	2.56647	4.37132	0.549076	6.54218	5.9083	1.20781	1.13961	2.63352	3.47394	6.90049	1.77121	3.14194	4.77485	1.92586	1.87014	2.15201	2.433	6.28439	1.79143	0.206892	0.503956	2.15264	2.34002	-1.72604	2.51588	1.46027	2.0159	0.8449
7C1a	C	7	-1.83201	4.79607	2.54774	5.05559	3.21658	2.72375	2.37618	2.07505	-1.83201	3.99144	2.79003	8.13912	1.89763	4.99552	1.53098	3.02976	2.28155	-1.83201	4.82793	-1.83201	4.43043	0.781781	6.57754	5.84232	1.29791	1.11103	2.24934	3.6502	6.93099	1.64127	2.86301	4.62098	2.09882	2.1357	2.14165	2.81403	6.01094	2.22443	0.592329	0.196525	2.17608	2.78338	0.873492	3.00054	2.12418	2.51865	1.67034
7C1b	C	7	-1.84509	4.8017	1.92256	5.06353	3.03081	2.79866	2.4197	1.91023	0.476526	3.88255	2.53898	8.16952	1.82878	5.00823	1.32517	2.97892	2.3069	0.98213	4.80233	-1.84509	4.42172	0.770714	6.55955	5.85295	1.35292	1.09949	2.17213	3.60974	6.9071	1.66765	2.91075	4.61524	2.24207	2.39287	2.18212	2.81262	6.02808	2.09656	0.600099	0.101858	2.27211	2.75201	0.915483	2.988	2.04623	2.52102	1.51312
7C1c	C	7	-1.77295	2.74714	2.6083	5.15051	3.2383	2.8732	2.50089	1.91418	-1.77295	4.03835	2.85516	8.11574	1.87771	4.99806	1.57056	3.07779	2.32292	1.05897	4.88797	-1.77295	4.48427	0.821359	6.64463	5.91921	1.40209	1.11546	2.297	3.71479	6.96698	1.57204	2.99236	4.66047	2.32742	2.3805	2.26365	2.89453	5.98648	2.2967	0.524611	0.242774	2.22589	2.71514	0.867557	3.12671	2.13437	2.58113	1.59238
7C2a	C	7	-1.75412	4.77349	2.6371	5.12952	3.1739	2.82784	1.72189	2.04418	-1.75412	4.23986	2.69399	8.14979	1.73005	4.94634	1.5785	2.98694	2.39108	0.973014	4.8463	-1.75412	4.5106	0.769129	6.56805	5.86882	1.33041	1.10033	2.35313	3.64512	6.80641	1.96139	2.33735	4.61763	2.36805	2.59315	2.27918	2.95244	6.01203	2.27742	0.712054	0.19151	2.19782	2.98048	0.932887	3.16978	2.12151	2.78475	1.78027
7C2b	C	7	-1.74264	4.91717	2.68005	5.12846	3.21464	2.80647	2.57518	1.9894	-1.74264	3.98062	2.61078	8.08468	-1.74264	4.90052	1.56341	3.01951	2.32396	-1.74264	4.78649	-1.74264	4.4833	0.785484	6.59202	5.8594	1.31991	1.10992	2.29809	3.66485	6.88369	1.76173	2.89659	4.58471	2.32712	2.49314	2.26573	2.91783	6.00862	2.36705	1.19461	0.178842	2.01211	2.81559	-1.74264	3.09192	2.15148	2.75473	1.7123
7C2c	C	7	-1.76285	4.79166	2.70475	5.11263	3.2133	2.78701	2.61529	-1.76285	-1.76285	3.94578	2.71852	8.1642	1.78302	4.95853	1.60728	2.98501	2.33476	0.956505	4.75112	-1.76285	4.47167	0.867579	6.56418	5.85588	1.26457	1.0271	2.82034	3.62242	6.77788	1.89851	2.28079	4.60881	2.32443	2.46377	2.30969	2.87743	6.07499	2.29035	0.659299	0.264423	2.19488	2.8976	0.875818	3.09205	2.07759	2.69553	1.67006
7C3a	C	7	-1.81872	4.88068	2.52812	5.06485	3.19155	2.79152	2.48453	1.99064	-1.81872	3.8438	2.6509	8.0573	1.84662	4.97358	2.69536	2.99938	2.19309	0.986749	4.80046	-1.81872	4.3933	0.873586	6.63091	5.8378	1.58474	1.31398	2.32679	3.78953	6.86925	1.60887	2.89324	4.56915	2.26889	2.42006	2.14252	2.73263	6.05592	2.25174	1.14999	0.351998	1.8987	2.6895	0.752939	2.96427	1.976	2.55307	1.71181
7C3b	C	7	-1.50353	4.69451	2.87465	5.38186	3.51311	3.07168	2.7895	-1.50353	-1.50353	4.2078	3.06878	6.86531	2.15154	5.28653	3.08329	3.30007	2.471	1.3166	5.10913	-1.50353	4.72043	1.17334	6.90049	6.13891	1.82123	1.58687	3.28503	4.10265	7.19598	1.87544	3.16825	4.89775	2.69455	2.82825	2.47215	3.17431	6.21494	2.63269	1.37554	0.733906	2.23741	3.03559	1.12787	3.28105	2.44487	2.8736	2.11903
7C3c	C	7	-1.76049	4.92666	2.63946	5.00627	3.23231	2.84853	2.51239	1.96076	1.14052	3.91457	2.8483	8.11064	1.89805	5.02226	2.8727	3.02524	2.22167	1.02043	4.8351	-1.76049	4.45929	0.942981	6.60426	5.88341	1.64763	1.34776	2.2954	3.88924	6.8065	1.71373	2.91983	4.62454	2.31934	2.15496	2.23892	2.80056	6.05587	2.15036	1.0528	0.388891	2.04889	2.78359	0.797901	3.00059	2.08812	2.57049	1.73065
7X1a	X	7	-1.65917	4.21981	2.61313	3.9672	4.16552	2.71482	2.67717	3.1541	-1.65917	4.44584	2.62152	8.24888	2.32553	5.37702	1.72688	4.10879	-1.65917	1.50844	4.82773	2.71806	4.46596	-1.65917	6.48607	5.86689	1.4958	1.3894	2.43365	3.81909	6.80083	1.73354	3.5929	4.63204	1.79498	1.8071	2.28107	1.8309	5.79417	1.27573	0.759411	0.839941	2.3281	1.68515	0.744055	2.13077	1.4218	1.48046	0.678742
7X1b	X	7	-1.36846	4.16423	2.94619	4.26029	4.46777	2.95959	2.84363	3.45024	2.2259	4.69441	2.93168	7.3623	2.69793	5.66392	1.88645	4.36877	-1.36846	1.75293	5.15853	3.02569	4.73745	0.829741	6.64398	6.04647	1.83229	1.74893	3.09227	4.11974	7.08499	1.97624	3.8716	4.91458	2.08525	2.25283	2.50917	2.24257	6.43411	1.54819	0.891367	1.15109	2.57157	1.9068	0.624038	2.37339	1.75333	1.76217	0.994258
7X1c	X	7	1.08525	4.09663	2.62229	3.88081	4.09497	2.58412	2.49555	3.03134	1.95937	4.34523	2.44575	8.41156	2.27035	5.21354	1.91587	4.01143	-1.75195	1.43032	4.72491	2.62465	4.38188	0.395509	6.28429	5.66756	1.44874	1.2942	2.19313	3.72527	6.79952	1.63096	3.50022	4.50503	1.60407	1.78429	2.11407	1.67765	5.88965	0.84288	0.47861	0.768469	2.18548	1.5542	-1.75195	1.94334	1.17457	1.27214	0.495203
7X2a	X	7	-1.75569	4.03471	2.12119	3.80199	4.02523	2.4994	2.4502	2.98649	1.80661	4.39569	-1.75569	8.63745	2.18803	5.22005	1.45688	3.93639	1.26776	1.43513	4.64662	2.54512	4.32206	0.390416	5.29006	5.7337	1.37117	1.23311	2.29314	3.67239	6.7755	1.45205	3.41242	4.47493	1.65952	1.85671	2.09888	1.73121	5.80811	1.07627	0.773889	0.563901	2.10515	1.42752	0.505922	1.91536	1.24044	1.29282	0.450716
7X2b	X	7	-1.67759	4.18791	2.59883	3.94603	4.11336	2.55171	2.55817	3.0646	1.88058	4.37533	2.43906	8.38136	2.25987	5.23248	1.50561	3.98992	-1.67759	1.47505	4.68008	2.61196	4.39982	-1.67759	6.36098	5.69316	1.4212	1.32842	2.38691	3.75642	6.72698	1.65327	3.47336	4.55666	1.41913	1.76424	2.14987	1.65321	6.04335	1.03657	0.454416	0.552358	2.29538	1.5583	0.58913	1.93682	1.25244	1.38702	0.487733
7X2c	X	7	-1.37317	4.40656	2.81091	4.20813	4.43583	2.84283	2.86802	3.48737	2.19684	4.67009	2.73204	7.3549	2.54779	5.54531	1.89525	4.31384	-1.37317	1.74879	5.01107	2.90913	4.741	-1.37317	6.68816	6.09013	1.70746	1.55626	2.68889	4.05425	7.12921	1.88997	3.77147	4.81494	1.97941	2.23446	2.506	2.1295	6.39994	1.41544	1.17189	-1.37317	2.52583	1.76141	-1.37317	2.20346	1.59068	1.58986	0.906956
7X3a	X	7	-1.38113	4.4475	-1.38113	4.21977	4.4463	2.92751	2.83692	3.44114	2.18185	4.64758	2.71998	7.26919	2.5437	5.62283	3.00139	4.28849	-1.38113	1.79659	5.06243	2.91746	4.6952	-1.38113	6.57235	5.99947	1.89222	1.75905	3.10487	4.17273	7.19356	1.84216	3.7678	4.88377	1.84298	2.1828	2.49661	2.16043	6.39305	1.38848	0.800253	1.05294	2.5594	1.95552	0.641362	2.3439	1.62266	1.77494	0.806033
7X3b	X	7	-1.76057	3.02604	2.54719	3.83579	4.09624	1.9847	2.3916	3.05737	1.84134	4.27793	2.35641	8.62193	2.17609	5.20535	2.6786	3.90994	1.19565	1.4485	4.64217	2.53081	4.32655	0.713855	5.55258	5.63375	1.49923	1.35644	2.28167	3.78984	6.80897	1.7536	3.38449	4.49461	1.22959	1.72463	2.12957	1.68523	5.73518	1.08726	0.345632	0.710951	2.27528	1.57178	-1.76057	1.98953	1.22325	1.41419	-1.76057
7X3c	X	7	1.03809	4.01248	2.46486	3.80211	3.99175	2.49675	2.35721	2.9016	1.70882	4.19966	2.33038	8.51766	2.08435	5.15704	2.64371	3.87522	1.16754	-1.82643	4.52656	2.44437	4.27599	0.531024	6.15079	5.58505	1.46739	1.34293	2.63773	3.73005	6.73124	1.52693	3.37755	4.40264	1.64897	1.73502	2.10638	1.66405	5.97443	1.14614	0.364955	0.644067	2.07	1.43264	0.404648	1.90689	1.22933	1.31396	0.437121
QC1	QC	QC	1.5814	5.05718	2.40428	4.35334	3.52924	2.21422	2.39186	1.824	1.53456	3.75668	4.41148	8.05083	2.67133	5.75253	1.01683	3.71684	1.91265	1.0959	4.66693	1.35225	4.21278	1.83005	6.48576	5.77461	1.69662	1.67854	2.63209	4.13677	6.73643	1.31508	3.31436	4.60437	1.87589	1.98573	2.03123	2.37689	5.9529	1.76767	0.556362	0.444979	1.99965	2.44419	0.587485	2.93229	1.90568	2.74592	1.50767
QC2	QC	QC	1.6576	4.96777	2.43736	4.23293	3.56828	2.31205	2.3714	1.93863	1.59753	3.90946	4.41465	8.09574	2.67487	5.56378	1.3745	3.75007	1.91523	1.11706	4.6785	1.28177	4.22328	1.77024	6.47775	5.78431	1.85719	1.69662	2.12371	4.13475	6.74682	1.52649	3.35145	4.63085	1.8401	1.85431	1.96826	2.388	5.98183	1.79502	0.263072	0.282515	1.97935	2.40259	0.536153	2.92343	1.5285	2.68339	1.51487
QC3	QC	QC	1.62428	5.17053	2.44357	4.37062	3.63248	2.30274	2.44811	1.89424	1.67475	3.76603	4.36675	8.09277	2.63194	5.72902	1.30011	3.73438	2.00187	1.11099	3.38127	1.30174	4.18138	1.74719	6.49147	5.79509	1.84077	1.70341	2.11647	4.1299	6.86218	1.55973	3.31714	4.65285	1.82861	1.9113	2.06606	2.34756	5.76772	1.65768	0.480265	0.328307	2.13322	2.48288	0.563925	2.94811	1.87304	2.67319	1.47998
QC4	QC	QC	1.63087	5.16558	2.46239	4.42332	3.29506	2.31622	2.42986	2.08484	1.60311	3.7151	4.38483	8.0731	2.62354	5.53672	1.36781	3.71124	1.88149	1.00288	4.63962	1.30791	4.18575	1.72366	6.46332	5.74933	1.87785	1.72822	2.13662	4.10355	6.86025	1.54992	3.35171	4.57008	1.83505	1.90102	2.03748	2.31818	5.97768	1.62794	0.437601	0.258716	2.04994	2.49426	0.533501	2.92819	1.83557	2.64454	1.48404
QC5	QC	QC	1.63301	5.24338	2.13596	4.3573	3.59467	2.36064	2.45489	1.88394	1.64349	3.74165	4.41747	8.08613	2.6789	5.74754	1.41511	3.73383	1.84164	1.09888	4.60718	1.32241	4.11651	1.74624	6.46314	5.73023	1.88142	1.79946	2.12107	4.0823	6.72276	1.04174	3.26885	4.52055	1.80768	1.94242	1.98904	2.29816	5.97669	1.65904	0.180663	0.339425	2.06419	2.40532	0.61047	2.9098	1.62579	2.62346	1.45473
QC6	QC	QC	1.70266	5.07901	2.47186	4.33378	3.58531	2.30416	2.44474	2.07901	1.5105	3.78232	4.41999	8.05431	2.66089	5.56644	1.50799	3.13487	1.84156	0.477302	4.6869	1.31288	4.21152	1.67083	6.49284	5.77674	1.89832	1.70939	2.14796	4.07078	6.86144	1.4947	3.3507	4.60061	1.85552	1.96873	2.0571	2.3718	6.01294	1.58924	0.246802	0.246548	2.0244	2.44915	0.583784	2.97016	1.84524	2.67021	1.55074
QC7	QC	QC	1.83458	5.35126	2.62737	4.60948	3.73586	2.46656	2.59686	2.12488	1.63344	3.9209	4.56612	7.48283	2.81846	5.72736	1.63147	3.86116	1.93727	1.23486	4.82509	1.43754	4.34992	1.90841	6.63057	5.90435	2.03567	1.92197	2.35753	4.22786	6.96939	1.50923	3.50583	4.71541	2.01994	2.10895	2.13254	2.55126	6.15672	1.8524	0.633047	0.415448	1.91568	2.53109	0.64054	3.07693	1.95902	2.7989	1.66165
QC8	QC	QC	1.5853	5.22476	2.37175	4.37781	3.52003	2.206	2.34618	1.81005	1.5186	3.80543	4.38338	8.05086	2.64768	5.7333	1.10894	3.74347	1.73795	1.06907	4.65083	1.29504	4.2088	1.82066	6.467	5.78469	1.66709	1.65888	2.74226	4.17196	6.8114	1.16824	3.24259	4.56583	1.88361	2.03739	2.01478	2.34819	5.82322	1.7737	0.695372	0.354565	1.81392	2.37444	0.22731	2.82597	1.82754	2.63027	1.40167
QC9	QC	QC	1.65701	5.1088	2.37629	4.47716	3.49091	2.24825	2.32147	2.09742	1.49775	3.69361	4.39305	8.08985	2.67605	5.74999	1.26959	3.73421	1.77966	0.827583	4.65162	1.32886	4.20404	1.71743	6.46447	5.77094	1.83041	1.72571	2.19483	4.12353	6.71579	1.51588	3.25642	4.6162	1.8127	2.07856	1.9638	2.37651	6.00266	1.73273	0.425895	0.347752	1.94801	2.41766	0.393342	2.8844	1.91437	2.65066	1.54655
QC10	QC	QC	1.67574	5.31439	2.37551	4.49658	3.51529	2.28609	2.27389	2.06313	1.5094	3.77566	4.38504	8.08635	2.63799	5.58465	1.19389	3.68784	1.89731	0.627798	4.61439	1.29764	4.21348	1.79132	6.54252	5.82085	1.81481	1.71315	2.1842	3.80874	6.76471	1.56233	3.3395	4.71436	1.88275	1.97481	2.01511	2.38637	5.70915	1.78092	0.217569	0.336989	2.16925	2.4752	0.552792	2.96486	1.81026	2.69398	1.52448
QC11	QC	QC	1.74728	5.27364	2.48872	4.58828	3.67811	2.37347	2.40343	2.19028	1.48137	3.82935	4.30548	7.80168	2.73083	5.77404	1.32884	3.36031	1.83004	1.10578	4.70503	1.3604	4.3017	1.85433	6.54028	5.85331	2.02427	1.90272	2.82606	4.19083	6.89244	1.54898	3.31438	4.69062	1.88746	2.08549	2.0469	2.31576	6.05191	1.78214	0.456891	0.447142	1.97274	2.37996	0.505378	2.94661	1.96777	2.6952	1.39274
QC12	QC	QC	1.61249	5.24926	2.31963	4.45845	3.53246	2.18474	2.25477	1.98689	1.26392	3.62591	4.28476	8.15907	2.5986	5.66975	1.11824	3.63716	1.725	1.10838	4.55623	1.22735	4.10702	1.64596	6.41793	5.70416	1.79501	1.67843	2.57972	4.00163	6.79759	1.43957	3.19979	4.53586	1.80321	1.92641	1.97248	2.3026	5.77129	1.67899	0.265442	0.194387	1.95765	2.36207	0.535781	2.87048	1.86725	2.60442	1.44069
QC13	QC	QC	1.75532	5.27282	2.45006	4.58697	3.56009	2.27985	2.38291	2.08012	1.3933	3.65749	4.38947	8.04369	2.63224	5.73018	1.14048	3.64944	1.64219	1.11325	4.59544	1.30853	4.14617	1.80925	6.44157	5.7262	1.84379	1.74766	2.09905	4.00594	6.82517	1.42196	3.29583	4.56138	1.58019	1.98635	2.00721	2.29204	5.98403	1.67934	0.767681	0.438552	1.83653	2.29195	0.444528	2.79823	1.84273	2.5725	1.49351
QC14	QC	QC	1.73986	5.33521	1.81432	4.55645	3.57891	2.2657	2.33905	1.85976	1.25442	3.7281	4.37659	8.00466	2.66432	5.71705	1.37255	3.59379	1.6237	1.05983	4.6377	1.2733	4.13937	1.72808	6.46698	5.77585	2.00422	1.81439	2.19062	4.08094	6.84103	1.42723	3.26607	4.62429	1.88305	1.98419	2.07042	2.30133	5.97461	1.68323	0.662479	0.342459	1.93226	2.36331	0.520931	2.85542	1.85731	2.62447	1.52076
C = cortex; X = xylem
[truncated: 7 more columns]

## Sheet: Table S3
Table S3 Contents of saccharides for glycomics study of MOR in different growth years
Sample	Year(s)	Fru	Man	Glu	Gal	Suc	DP3	DP4	DP5	DP6	DP7	DP8	DP9	DP10	Poly
1W-1	1	3865.5	7065.5	3850.29	594.347	44831.6	36031	48953.4	63727.9	63164.6	56763.5	50337.8	41128.3	34169.8	13229.6
1W-2	1	3997.92	7314.81	3776.32	538.166	44361.9	36580	51760	67152.1	66202	57779.7	51023.7	41909	34233.7	12873.6
1W-3	1	3989.23	7299.41	4149.36	607.972	45695.8	37062.4	52650.9	67623.4	68302.8	60062.4	53410.4	43904.4	35560.3	12774.1
2W-1	2	19360	12057.4	6971.53	676.225	55553.7	61376.4	63122.9	72360.7	69112	63749.1	56247.8	46634.1	37400.9	14103.6
2W-2	2	17163.2	13349.8	7080.47	640.557	58010	63354.6	63479.6	75405.3	72053.5	66503.9	59686.6	50292.8	41256.1	14006.1
2W-3	2	16892.4	12982.6	7174.69	712.121	56934.6	63725.5	62454.5	74415.7	72043.4	67630.2	60924.1	52846.1	43527	13849.3
3W-1	3	10425.3	19112.3	3457.55	1111.87	72513.8	42091.9	65614.7	79732.6	85172.3	80326.1	69236.4	56819.2	45431.5	16296.7
3W-2	3	10468.3	19241.2	3678.82	1074.57	74296.4	42848.6	66104.7	80143	86336.1	81724.3	69928.9	57749.2	45279.3	16350.9
3W-3	3	10523.5	19237.4	3634.14	1174.94	71935.4	42294.9	66286.2	80030.9	85711.3	79525.7	68107.3	55469.4	43238.8	14178.2
4W-1	4	7418.36	13282.5	2178.25	1270.72	66568.1	71432.9	81402.5	98239	105043	96396.7	83048.6	69426.6	54921.4	12148.3
4W-2	4	7591.62	13790.3	2574.57	1348.64	70427.8	74439.6	82581.9	100702	108029	98127	85025.6	69949.4	55283.2	13036.5
4W-3	4	7612.76	13670.6	2123.55	1520.74	71821.2	74466.7	82771.5	100124	106915	97788.3	84809.2	69726	54834.7	13209.7
5W-1	5	11379.1	15807.6	5155.8	2040.65	55845	88543	88552.4	103783	97042.3	86200	74001.8	60929.5	48423.3	11175.6
5W-2	5	11725.2	15736.4	5666.79	2089.77	57611.2	90779.4	87458.3	105691	98174	86995.2	73860.4	60996.8	47967.5	11692.2
5W-3	5	11735.2	15691.1	5307.91	2212.68	57537.1	90336.7	85357.1	102482	95960.1	85916.6	73961.4	60954.6	48028.8	13059.8
6W-1	6	13993.2	13326.3	4355.92	1453.73	55120.6	54015.8	71271.9	86320.7	91979.5	87855.5	76828.5	64852.3	52493.9	11740.1
6W-2	6	13922	13834.5	5052.29	1433.93	54578.5	54029.2	71556.6	86838.2	91739.5	88397.6	78018.1	65342	53886.7	11875.2
6W-3	6	14247.2	13965.5	4980.95	1738.23	56353.8	53658	72465.2	87250.9	88285.4	87660.9	77066.2	65315.5	53578.3	12041.8
7W-1	7	8685.14	9631.31	3130.43	2297.02	51291.1	52694.1	70684.7	86507	93976.8	93170.5	85839.7	75409.4	63372.2	13162
7W-2	7	8966.15	10518.2	3308.55	2090.14	51268.4	52190.5	70787.1	86918.4	94739.1	92229.1	85143.3	73957.3	61269.3	13897.8
7W-3	7	8950.45	11114.8	3179.3	2233.82	53126.2	53200.6	70995	85559.1	94447.9	91636.1	83623	73004.9	62144.4	11648.1
unit in µg/g
Fru = fructose; Man = mannose; Glu = glucose; Gal = galactose; Suc = sucrose; DP3 = 1-kestose; DP4 = nystose; DP5 = 1F-fructofuranosylnystose; Poly = polysaccharides

## Sheet: Table S4
Table S4 Contents of saccharides for glycomics study of MOR in different tissues
Sample	Tissue	Year(s)	Fru	Man	Glu	Gal	Suc	DP3	DP4	DP5	DP6	DP7	DP8	DP9	DP10	Poly
1C-1	C	1	4902.01	5843.83	3811.76	1262.08	39353.2	33993	48582.1	59566.5	56446.2	47119.1	37557	27138.7	18018.3	14551.5
1C-2	C	1	5205.32	6410.15	3993.02	1387.12	41900.7	35883.4	50820.6	64063.8	63737.6	55118.5	45776.3	31912	22246.9	14185
1C-3	C	1	5044.86	6025.98	3788.51	1302.72	41459.3	36815.3	52918.5	64235.4	64524.5	57278.5	47390.8	34704	24668.8	14036.4
1X-1	X	1	11283.8	11187.4	8329.09	3786.26	60303.6	43127.1	55549.7	63606.8	48786.1	36661.2	25849.1	17755.7	11991.7	14839.1
1X-2	X	1	11115.3	11314.1	8075.95	3079.79	53529.6	43632.3	55694.2	65944	56991	45471	33805.7	24187.9	16578.1	12461.5
1X-3	X	1	11515.4	11654	8352	3758.77	62162.7	45130.4	56877	65134	49531.2	40289.3	29018.1	20694.7	14150.8	14557
2C-1	C	2	11719.2	12252.3	4747.59	1696.05	59367	42600.3	64673.2	79393.1	86256.7	79016.1	66301.1	50494.1	36151.7	13382.6
2C-2	C	2	11373.3	12179	6157.07	1334.15	58287.1	41224.8	65706.7	80735.4	84815.3	77717.3	62682.7	47199.7	32075.7	10972.7
2C-3	C	2	14279.7	13219.5	6048.87	1564.24	59588.8	43078.7	67223.5	82378.3	78438.2	73246.8	58245.7	44151.2	30772.6	12826.6
2X-1	X	2	13843.2	8252.45	3874.73	993.34	45775.8	24388	40982.3	49488.2	36036.4	29478.7	20714.4	13153.3	8089.99	11723.5
2X-2	X	2	12243.8	8106.05	3676.41	1178.42	44117.9	23277.9	40275.9	50354	37376.2	31994.3	24379.1	16547.5	10229.8	9341.71
2X-3	X	2	12906.3	8077.97	3885.71	1289.31	45287.7	24414.2	42779.4	51350.4	39300.7	34596.5	26034.7	18481.5	11629.2	10200.9
3C-1	C	3	21446.5	16436.4	5254.3	1630.35	53593.6	38949.1	58260.5	68432.3	62353	67002.3	57026.6	45875.7	32535.5	15814.6
3C-2	C	3	21627.3	16757.8	5486.61	1368.19	54783.2	45051.5	60204	70982.6	71213.4	72008.2	64791.4	51618.8	38674.2	16290.5
3C-3	C	3	22082.9	16811.4	5431.97	1587.89	55216.8	45763.7	61089.5	71722.4	67193.4	75447	66888	54119.4	40746.8	15959.5
3X-1	X	3	22357	14482.6	4307.16	615.634	48670	19377.4	42702.5	49120.3	32802.5	29080.5	21682.9	15259.5	9649.28	14427.4
3X-2	X	3	23277.5	13426.3	4279.76	695.415	48618.2	19169.3	43231.4	51220.3	36230.8	32998	25469.3	17878.8	11579.6	13715.4
3X-3	X	3	23351.9	13985.2	4618.67	698.773	50463.9	20403.5	43817.1	53009.2	37592.8	34450.6	27273.5	19162.9	12325.7	12797.5
4C-1	C	4	9515.01	13874.2	3374.91	2048.74	50038.5	48674.9	69363	83741.8	126068	115951	94379.2	70233.9	49540.6	13197.8
4C-2	C	4	9535.28	13882.8	3477.07	2169.59	51892.7	50834.4	71350.2	87472.1	132779	122586	100667	77210.5	55355.7	14335
4C-3	C	4	9582.82	13853.6	3413.94	2336.56	58168	51018.4	72052.3	87893.2	137108	129564	108071	85082.5	59776.8	12335.9
4X-1	X	4	10829.8	11149.6	3187.73	1648.15	60897	41691.4	56114.2	64214.5	50191.1	39394.5	28102.7	18616.8	11383.9	10001.7
4X-2	X	4	10596.1	10937.5	2804.9	1662.39	60536.2	42365.2	55259.9	65173.7	56919.8	47595.7	34920.5	23039.2	14098.4	10820.8
4X-3	X	4	11340.8	11968.3	3226.8	1810.04	62891.1	44365.9	57670.6	68679.8	58496.2	49355.4	37116.4	25150.1	16196.2	9621.61
5C-1	C	5	10765.1	13252.4	4257.16	2135.31	54752.6	54263.3	73809	88951.4	103842	94284.1	76510.3	58444.1	40092.9	12499.6
5C-2	C	5	11177.2	13825.8	4346.15	2158.86	56691.4	55905.8	75539.5	91351.9	116870	107478	88842.6	66893.6	48204.4	10941
5C-3	C	5	11357.6	14561.1	4110.38	2080.92	58580.5	57377.2	78207.7	94331.8	119718	108630	90533.7	70492.6	51027.6	13690.5
5X-1	X	5	11137.8	12138.4	3554.21	1978.77	67927.1	44351.3	54677.6	62641.2	56000.5	44699.1	31572.8	20755.3	12732.3	12430.3
5X-2	X	5	10856	11178.2	3376.51	1880.57	59079.3	44024.5	55430	64501	63024.7	51199.1	37227.5	24924.4	15216.2	12935.5
5X-3	X	5	11103.7	11620	3301.69	1724.9	70635.6	44975	56786.5	65027.2	63149.3	53218.1	40087.7	27822.8	17781.9	13331.3
6C-1	C	6	13955.8	13570.9	4087.19	1631.25	58234.6	55700.1	68576.5	81819.2	96619.4	88859.7	72699.5	52781.2	36152.9	15433.9
6C-2	C	6	14332.5	14463.2	4280.32	1827.89	59419.1	52553.6	69640.3	84764.2	92621.6	93822.9	76407.7	57066.1	39559.1	15119.7
6C-3	C	6	14541.7	14696.3	4317.86	2093.59	60071.7	58362.7	70791.6	86164.3	105439	99579.5	81359.5	61419.7	43429.8	15535.4
6X-1	X	6	16431.8	13518.3	4458.78	1607.08	60498.3	45351.6	54627.1	63956.5	52161	47160.6	34196.6	22589.7	13437.9	11198.2
6X-2	X	6	15722.5	12245.2	4492.73	1359.28	62225.2	44946.3	54811.2	64226.8	56612.1	54811.5	41433.3	27891.4	17216	10294.1
6X-3	X	6	16455.8	13244	4364.44	1398.19	60292.5	46189.4	55363.6	65940.3	65487.1	58419.8	43282.4	29516	17975.5	12222.1
7C-1	C	7	8432.58	9607.23	2345.02	2791.15	46171.3	48663	63044.9	75583.6	96906.8	91198.8	78584	61267.8	46433.8	15964.3
7C-2	C	7	8657.22	10447.5	2441.63	2957.77	46678.9	49641.2	63580.8	77211.6	102894	101914	90576.7	74661.2	57447	17289.8
7C-3	C	7	8483.76	9828.32	2377.21	2316.03	45765.3	48312.6	63367.8	77072.7	101956	101176	89295.3	71292.5	53940.4	18395.8
7X-1	X	7	9416.03	8330.08	2803.54	2406.54	50642.4	31236.5	43851.6	51547.4	36319.9	31843.9	25389.3	18735.6	13372	8710.62
7X-2	X	7	9468.52	7921.26	2404.95	2002.52	50410.7	30601.7	43850.8	52242.9	38431.8	31031.7	23634.8	16781.4	11698.7	8934.83
7X-3	X	7	9640.83	7964.48	2226.46	2273.43	46230.9	32295.8	45229.3	54171.6	37522.6	34737.2	29289.7	22345.2	15607	10461.2
unit in µg/g
Fru = fructose; Man = mannose; Glu = glucose; Gal = galactose; Suc = sucrose; DP3 = 1-kestose; DP4 = nystose; DP5 = 1F-fructofuranosylnystose; Poly = polysaccharides

## Sheet: Table S5
Table S5 Occurrence of each feature in 14 groups of MOR samples for UpSet
Label;1C;1X;2C;2X;3C;3X;4C;4X;5C;5X;6C;6X;7C;7X
116.9294/12.86;1;1;1;1;1;1;1;1;1;1;1;1;1;1
132.92455/12.85;0;1;1;1;1;1;0;0;0;1;1;1;1;1
191.0202/1.71;0;0;0;0;0;0;0;0;0;0;0;0;0;0
223.04105/10.43;0;0;0;1;0;0;0;0;0;0;0;0;0;0
237.0574/10.57;0;1;1;1;0;1;0;0;0;1;1;1;0;0
238.0288/10.35;1;1;0;1;1;1;0;0;0;1;0;1;0;0
251.0366/10.42;0;1;0;1;0;1;0;1;0;1;0;1;0;1
253.0525/10.35;1;1;1;1;1;1;1;1;1;1;1;1;1;1
255.2349/11.56;1;1;1;1;1;1;1;1;1;1;1;1;1;1
267.0317/10.94;0;1;0;1;0;1;0;1;0;1;0;1;0;1
267.06825/10.46;1;1;1;1;1;1;1;1;1;1;1;1;1;1
269.04735/10.4;0;1;0;1;1;1;0;0;0;1;0;1;0;0
272.9613/0.81;0;0;0;0;0;0;0;0;0;0;0;0;0;0
277.2188/11.19;0;0;0;1;1;1;0;0;0;0;0;0;0;0
279.2351/11.37;0;1;1;1;1;1;0;1;0;1;1;1;1;1
281.0474/10.58;0;1;0;1;0;1;0;1;0;1;0;1;0;0
281.2507/11.61;1;1;1;1;1;1;1;1;1;1;1;1;1;1
283.0629/10.2;0;1;0;1;0;0;0;0;0;1;0;1;0;0
283.2664/11.99;1;1;1;1;1;1;1;1;1;1;1;1;1;1
293.214/10.76;0;1;1;1;0;0;0;1;0;1;0;0;0;0
295.2299/10.75;0;1;1;1;1;1;0;1;0;1;0;1;1;1
299.2607/11.65;0;0;0;0;0;0;0;0;0;0;0;0;0;0
311.17125/10.83;0;0;0;0;0;0;0;0;0;0;0;0;0;0
323.2222/11.56;0;1;0;0;0;0;0;0;0;0;0;0;0;0
325.1862/12.5;0;0;0;0;0;0;0;0;0;0;0;1;0;0
327.2925/12.12;1;1;1;1;1;1;0;1;0;1;0;1;0;1
329.2352/10.34;0;1;1;1;1;1;0;0;0;0;0;0;0;0
341.1113/1.22;1;1;1;1;1;1;1;1;1;1;1;1;1;1
347.1747/10.83;0;0;1;0;1;1;1;0;0;0;1;1;1;1
351.2536/11.99;0;1;0;0;0;0;0;0;0;0;0;0;0;0
355.324/10.8;1;1;1;1;1;1;0;1;0;1;1;0;0;1
369.3394/11.29;0;1;1;1;1;1;0;1;0;1;0;0;0;0
373.1166/7.11;1;1;1;1;1;1;1;1;1;1;1;1;1;1
377.0883/1.05;1;1;1;1;0;1;1;1;1;1;0;1;1;1
383.3555/11.78;1;1;1;1;1;1;1;1;1;1;1;1;1;1
387.097/8.37;1;1;1;1;1;1;1;1;1;1;1;1;1;0
389.1115/2.87;1;1;1;1;1;1;1;1;1;1;1;1;1;1
397.3708/12.31;0;1;1;1;1;1;0;1;0;1;0;0;0;1
403.3243/10.78;0;0;1;0;1;0;0;0;0;0;0;0;0;0
404.1075/1.11;0;1;0;0;0;0;0;0;0;0;1;1;0;0
405.1065/6.04;1;1;1;1;1;1;1;1;1;1;1;1;1;1
405.3402/11.69;1;0;1;0;1;0;1;0;1;0;1;0;1;0
413.1112/9.06;0;0;0;0;0;0;0;0;0;0;0;0;0;0
417.1064/4.69;1;1;1;1;1;1;1;1;1;1;1;1;1;1
431.1224/8.16;1;1;1;1;1;1;1;1;1;1;1;1;1;1
431.35595/11.77;0;0;1;0;1;0;1;0;0;0;1;0;1;0
433.1377/9.47;0;1;0;1;0;0;0;1;1;1;1;1;0;0
443.25/11.49;1;0;1;1;1;0;1;1;1;1;1;1;1;1
445.0951/10.24;0;0;0;0;0;0;0;0;0;0;0;1;0;0
449.0879/9.06;0;1;0;0;0;1;0;0;0;0;0;1;0;0
451.1481/8.49;0;1;1;1;1;1;0;1;1;1;0;1;0;0
455.35445/11.15;0;0;0;0;0;0;0;0;0;0;0;0;0;0
459.11735/9.06;1;1;1;1;1;1;1;1;1;1;1;1;1;1
461.1265/10.26;0;0;0;0;0;0;0;0;0;0;0;1;0;0
469.0685/1.78;1;1;1;1;1;0;1;1;1;0;1;1;1;0
476.1071/9.07;1;0;0;1;1;1;0;1;1;1;1;1;1;1
493.2321/10.18;0;0;0;0;0;0;0;0;0;0;0;0;0;0
535.1697/9.57;0;1;0;1;0;1;0;1;0;1;0;1;0;1
539.1415/1.05;1;1;0;0;1;1;0;0;1;1;1;1;0;0
557.0513/10.93;0;0;0;1;0;0;0;0;0;0;0;0;0;0
583.2833/9.76;0;1;1;1;1;1;0;0;1;0;1;0;1;0
599.1136/10.46;1;0;0;0;1;0;0;0;0;0;0;0;0;0
621.44045/11.17;1;1;1;1;1;1;1;1;1;1;1;1;1;1
679.2154/2.3;0;1;0;0;1;1;1;1;1;1;1;1;1;1
683.2284/1.17;0;1;1;1;1;1;0;1;0;1;0;1;0;1
691.18495/10.44;0;0;0;1;0;0;0;0;0;0;0;1;0;0
701.1954/1.07;1;0;1;1;0;0;1;0;1;0;0;0;1;0
713.4773/9.93;1;1;1;1;1;1;1;1;1;1;1;1;1;1
723.5063/9.93;1;1;1;1;1;1;1;1;1;1;1;1;1;1
740.4957/9.93;0;1;0;1;0;1;0;0;0;0;0;0;0;0
755.2494/1.47;1;1;0;0;0;1;0;0;0;0;0;0;0;0
760.24225/2.36;1;1;1;1;1;1;1;1;1;1;1;1;1;1
779.22965/2.76;1;0;1;1;1;1;1;1;1;1;1;1;1;0
809.4535/9.93;1;1;1;1;1;1;1;1;1;1;1;1;1;1
818.2659/2.53;1;0;1;1;1;1;0;1;1;1;1;1;1;1
835.25485/7.32;0;0;0;0;0;0;0;0;0;0;0;0;0;0
841.2687/2.52;1;1;1;1;1;1;1;1;1;1;1;1;1;1
845.2797/1.24;1;1;1;1;1;1;1;1;1;1;1;1;1;1
847.18245/10.46;1;0;0;0;0;0;0;0;0;0;0;0;0;0
851.27135/2.3;1;1;1;1;1;1;1;1;1;1;1;1;1;1
860.6509/11.89;1;0;0;0;1;0;1;0;1;0;1;1;1;0
863.2493/1.09;0;0;0;0;0;0;0;0;0;0;0;0;0;0
876.2614/1.95;0;0;0;0;0;0;1;0;0;0;0;0;0;0
877.2191/11.69;0;0;0;0;0;0;0;0;0;0;0;0;0;0
899.2927/2.69;1;1;1;1;1;1;1;1;1;1;1;1;1;1
